# Supplementary material for: In Situ Determination of Structure and Fluctuations of Coexisting Fluid Membrane Domains
Source: PubMed Central journal article supplement (PMC4336378; doi:10.1016/j.bpj.2014.11.3488), 2015-02-17
Supplement: mmc1.pdf [file mmc1.pdf]

# Supporting Material

## In situ determination of structure and fluctuations of coexisting fluid membrane domains

Peter Heftberger,<sup>†,‡</sup> Benjamin Kollmitzer,<sup>†,‡</sup> Alexander A. Rieder,<sup>†,‡</sup> Heinz Amenitsch<sup>§</sup>, and Georg Pabst<sup>†,‡</sup> \*

<sup>†</sup> University of Graz, Institute of Molecular Biosciences, Biophysics Division, NAWI Graz, Humboldtstr. 50/III, A-8010 Graz, Austria.

<sup>‡</sup> BioTechMed-Graz, Austria.

<sup>§</sup> Graz University of Technology, Institute of Inorganic Chemistry, Stremayrgasse 9/IV, A-8010 Graz, Austria.

\* Correspondence: georg.pabst@uni-graz.at

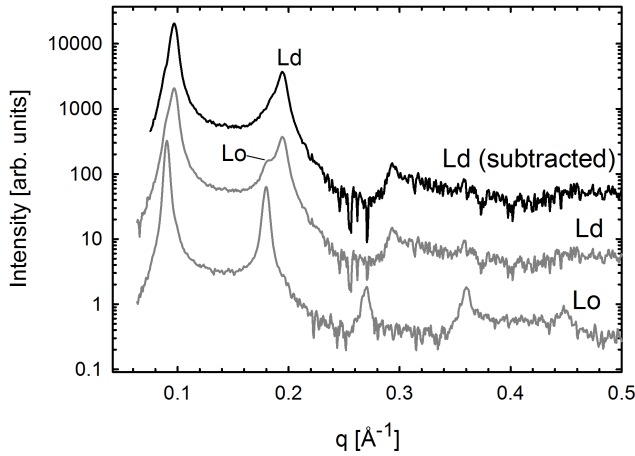

Figure S1: Subtraction of  $L_o$  contribution from  $L_d$  endpoint of  $B_{t2}$ . Scattering intensities are scaled by a constant for clarity. Second order Bragg reflections of  $L_o$  and  $L_d$  phases are indicated. Because of the overlap of  $L_o$  peaks for  $L_o$  and  $L_d$  endpoints (gray lines), we were able to subtract a fraction of  $L_o$  from the  $L_d$  endpoint sample. The result is shown in the top scattering pattern (black line).

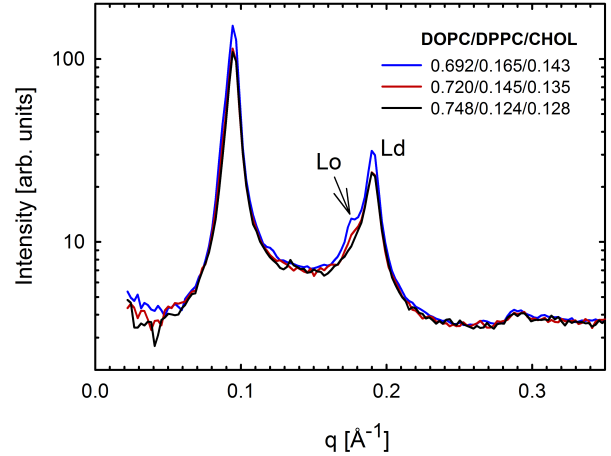

Figure S2: Determination of new  $L_d$  tieline endpoint for  $B_{t2}$ . Scattering patterns for three different lipid compositions, extending the  $B_{t2}$  tieline (1) toward the pure  $L_d$  regime (same angle), are shown. Data were recorded on a S3-Micro compact Kratky camera (Hecus X-ray Systems, Graz, Austria) at 15°C. The second order Bragg peak clearly indicates  $L_o$  contamination. No residual  $L_o$  was observed for the DOPC/DPPC/CHOL composition 0.748/0.124/0.128 (molar fractions).

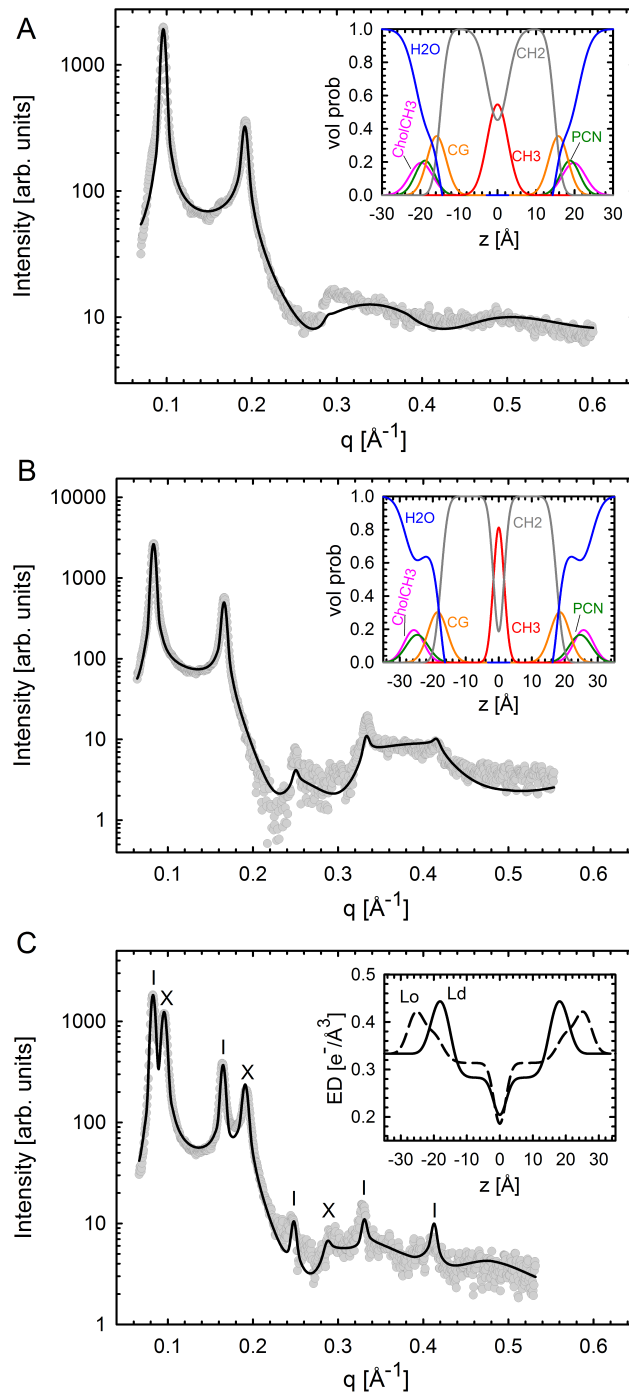

Figure S3: Validation of the global analysis for two coexisting phases for the  $A_{t2}$  tieline ( $T = 22^\circ\text{C}$ ). Panels A and B show fits to  $L_d$  and  $L_o$  endpoint data, respectively. The insets to both panels give the derived volume probability distributions. Panel C shows the best fit to SAXS data at the  $A_{t2}$  tieline midpoint. Bragg reflections of  $L_o$  and  $L_d$  domains are indicated with dashes and crosses, respectively. The corresponding inset gives the ED profiles for  $L_o$  and  $L_d$  phases.

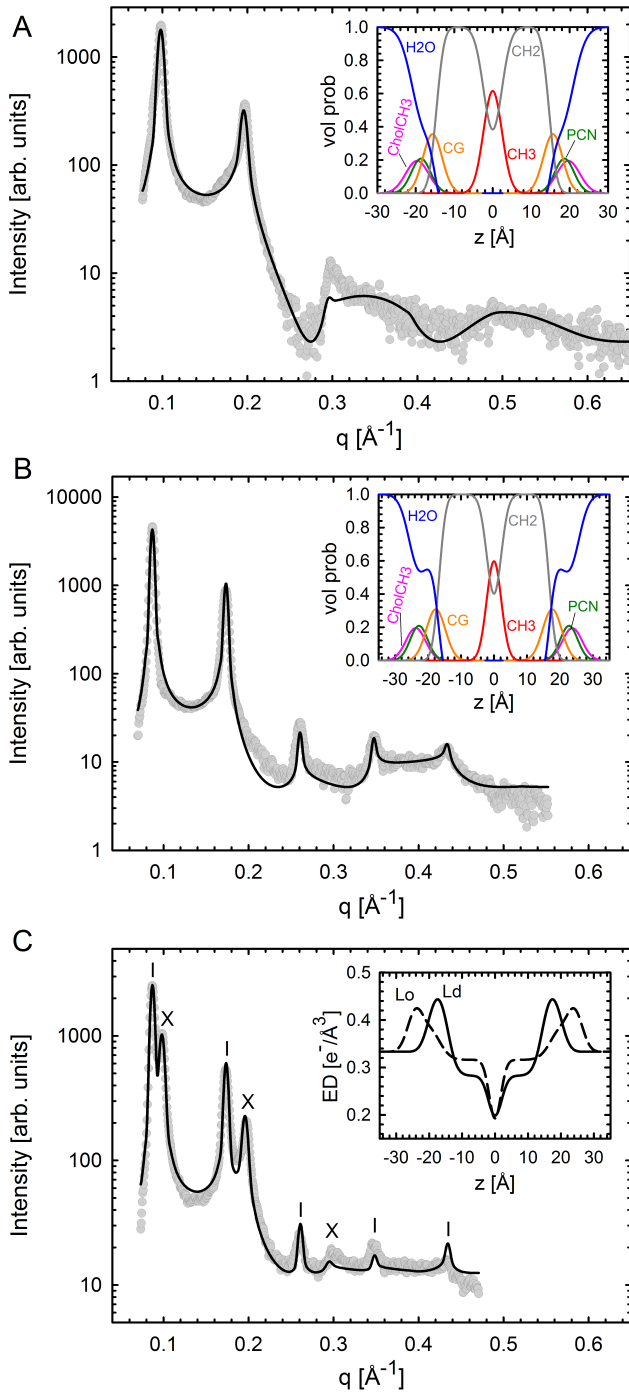

Figure S4: Validation of the global analysis for two coexisting phases for the  $B_{t1}$  tieline ( $T = 15^\circ\text{C}$ ). Panels A and B show fits to  $L_d$  and  $L_o$  endpoint data, respectively. The insets to both panels give the derived volume probability distributions. Panel C shows the best fit to SAXS data at the  $B_{t1}$  tieline midpoint. Bragg reflections of  $L_o$  and  $L_d$  domains are indicated with dashes and crosses, respectively. The corresponding inset gives the ED profiles for  $L_o$  and  $L_d$  phases.

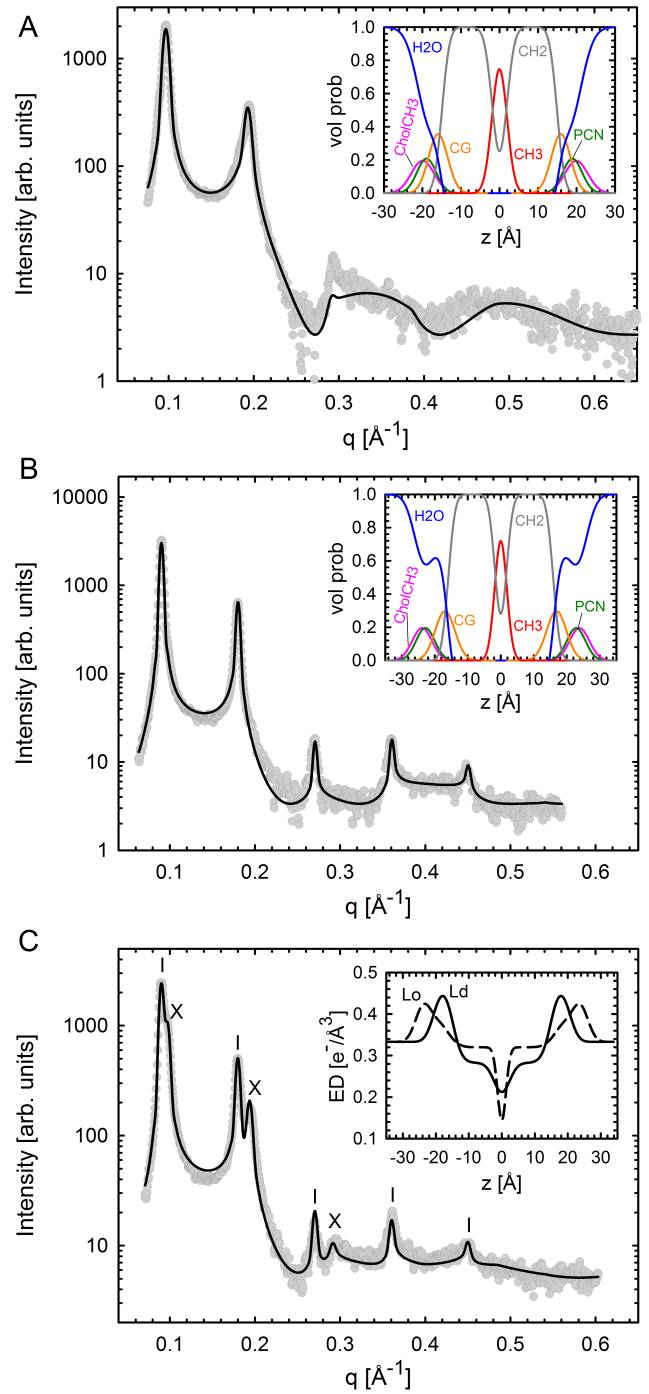

Figure S5: Validation of the global analysis for two coexisting phases for the  $B_{t2}$  tieline ( $T = 15^\circ\text{C}$ ). Panels A and B show fits to  $L_d$  and  $L_o$  endpoint data, respectively. The insets to both panels give the derived volume probability distributions. Panel C shows the best fit to SAXS data at the  $B_{t2}$  tieline midpoint. Bragg reflections of  $L_o$  and  $L_d$  domains are indicated with dashes and crosses, respectively. The corresponding inset gives the ED profiles for  $L_o$  and  $L_d$  phases.

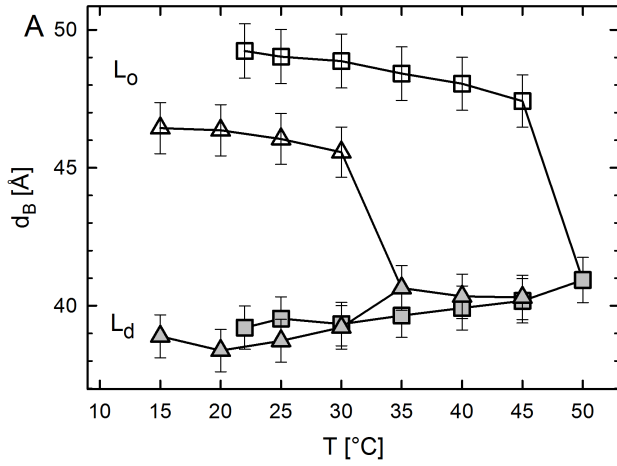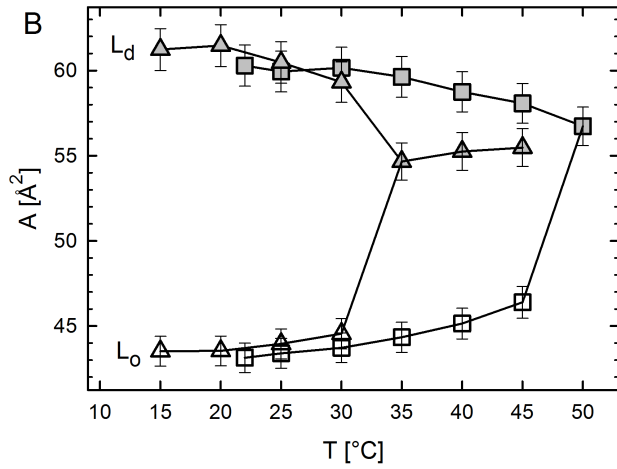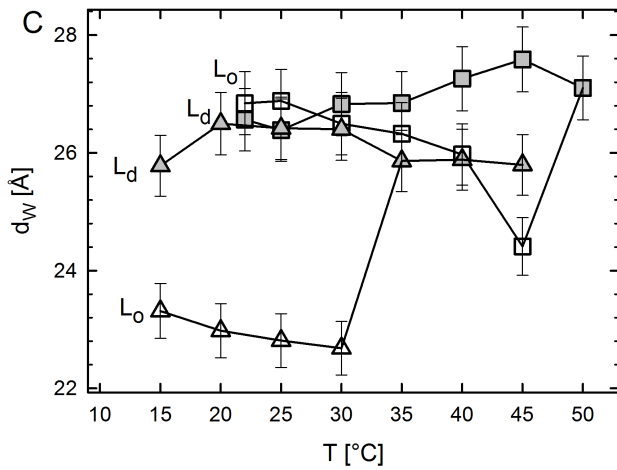

Figure S6: Temperature dependence of structural parameters of coexisting DOPC/DSPC/CHOL (squares) and DOPC/DPPC/CHOL (triangles) domains for  $t_2$  tieline compositions (Fig. 1, Table S1). Panels A–C show the bilayer thickness, area per lipid, and water layer thickness, respectively for  $L_d$  (solid symbols) and  $L_o$  (open symbols) domains.

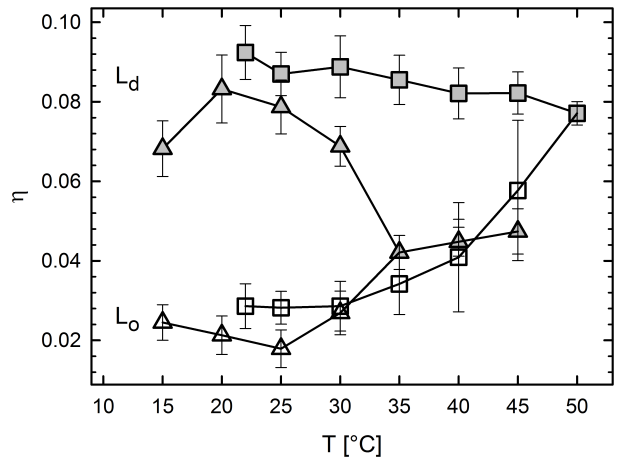

Figure S7: Temperature dependence of bending fluctuations of coexisting DOPC/DSPC/CHOL (squares) and DOPC/DPPC/CHOL (triangles) domains for  $t_2$  tieline compositions (Fig. 1, Table S1). Solid symbols show results for  $L_d$  and open symbols for  $L_o$  domains, respectively.

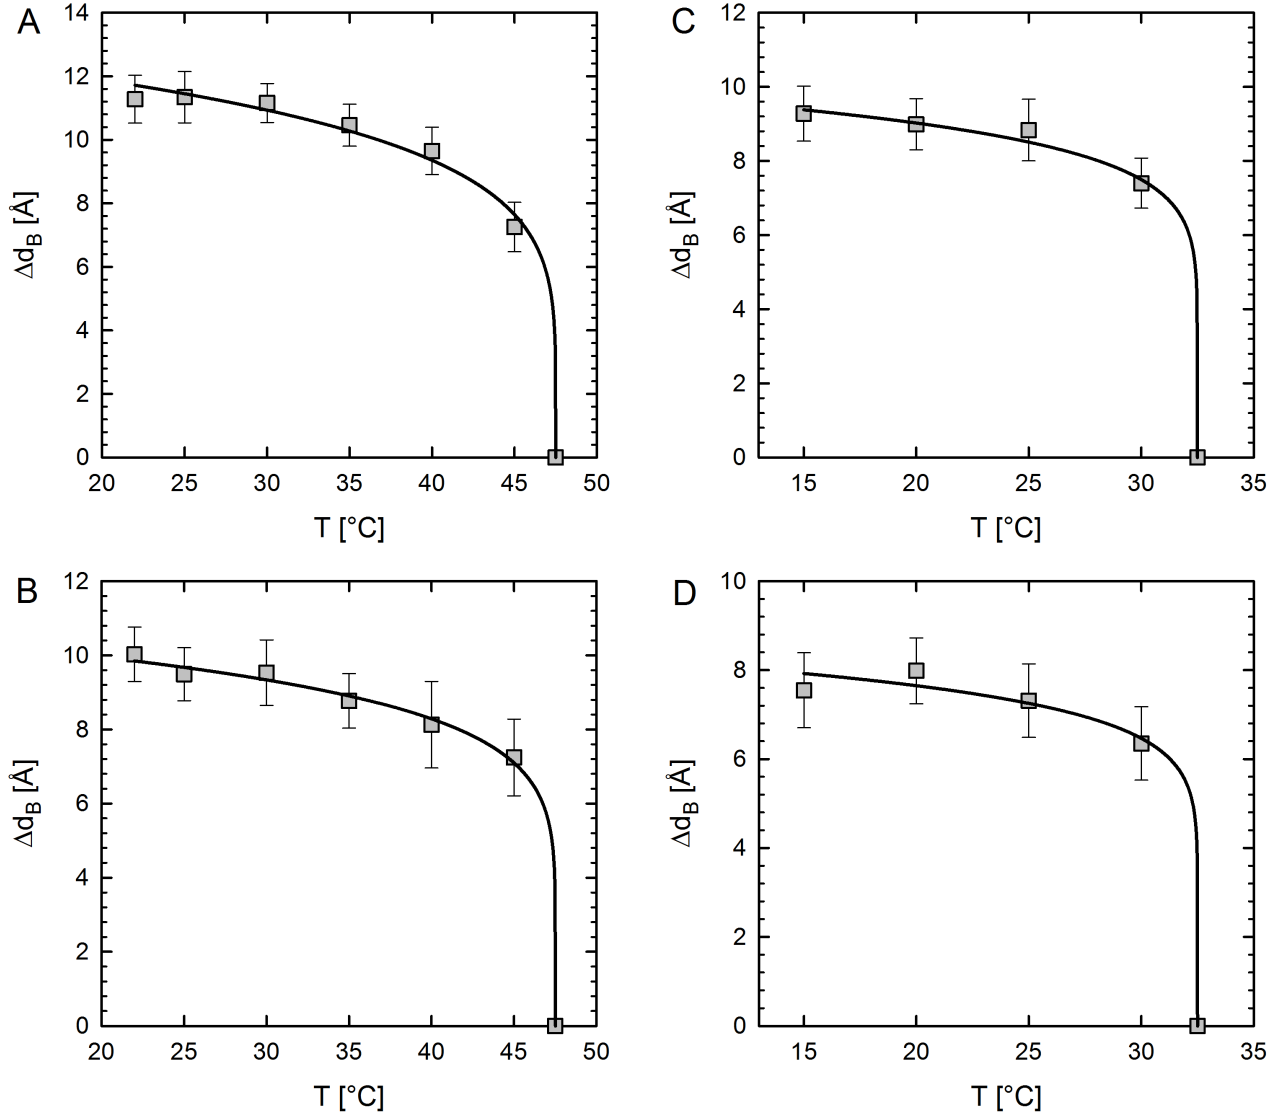

Figure S8: Critical behavior of height difference  $\Delta d_B$  between  $L_o$  and  $L_d$  domains of tieline midpoint samples  $A_{t1}$  (A),  $A_{t2}$  (B),  $B_{t1}$  (C) and  $B_{t2}$  (D). Solid lines correspond to the best fits using  $\Delta d_B \propto (T_C - T)^\beta$ .  $T_C$  was estimated to be 47.5°C for (A,B) and 32.5°C for (C,D) yielding the critical exponents  $\beta_A = 0.18$ ,  $\beta_B = 0.14$ ,  $\beta_C = 0.115$  and  $\beta_D = 0.105$ . To evaluate the influence of our choice of  $T_C$ ,  $T_C$  was varied between the extremes of the experimental temperature interval. For  $T_C^{min} = 46/31$ °C (for A,B/C,D), we obtained  $\beta_A = 0.14$ ,  $\beta_B = 0.11$ ,  $\beta_C = 0.08$  and  $\beta_D = 0.08$ . For  $T_C^{max} = 50/35$ °C (for A,B/C,D), we found  $\beta_A = 0.24$ ,  $\beta_B = 0.19$ ,  $\beta_C = 0.16$  and  $\beta_D = 0.24$ .

Table S1: Lipid compositions (molar fractions) of measured samples according to published compositional phase diagrams (1, 2). Two tielines with a lower ( $A_{t1}, B_{t1}$ ) and higher ( $A_{t2}, B_{t2}$ ) cholesterol concentration were studied (see Fig. 1).

|          |           | DOPC | DSPC | CHOL |
|----------|-----------|------|------|------|
| $A_{t1}$ | $L_d$     | 0.79 | 0.09 | 0.12 |
|          | $L_o$     | 0.05 | 0.65 | 0.30 |
|          | $L_d/L_o$ | 0.42 | 0.37 | 0.21 |
| $A_{t2}$ | $L_d$     | 0.74 | 0.09 | 0.17 |
|          | $L_o$     | 0.12 | 0.56 | 0.32 |
|          | $L_d/L_o$ | 0.46 | 0.30 | 0.24 |
|          |           | DOPC | DPPC | CHOL |
| $B_{t1}$ | $L_d$     | 0.70 | 0.23 | 0.07 |
|          | $L_o$     | 0.11 | 0.68 | 0.21 |
|          | $L_d/L_o$ | 0.37 | 0.47 | 0.16 |
| $B_{t2}$ | $L_d$     | 0.66 | 0.19 | 0.15 |
|          | $L_o$     | 0.12 | 0.58 | 0.30 |
|          | $L_d/L_o$ | 0.36 | 0.41 | 0.23 |

Table S2: Structural results and bending fluctuations for the studied tieline endpoints.  $V_L$  are the calculated and  $V'_L$  the experimentally determined molecular volumes of an effective lipid molecule, including contributions from all three components (for details, see subsequent section). Parameter uncertainties are  $< 2\%$ .

|              | $d_B[\text{\AA}]$ | $A[\text{\AA}^2]$ | $d_W[\text{\AA}]$ | $d_C[\text{\AA}]$ | $\eta$ | $V_L[\text{\AA}^3]$ | $V'_L[\text{\AA}^3]$ |
|--------------|-------------------|-------------------|-------------------|-------------------|--------|---------------------|----------------------|
| $A_{t1}-L_d$ | 38.6              | 62.9              | 25.8              | 14.6              | 0.079  | 1215                | 1233                 |
| $A_{t1}-L_o$ | 48.6              | 44.2              | 26.9              | 18.2              | 0.047  | 1075                | 1063                 |
| $A_{t2}-L_d$ | 39.1              | 60.5              | 26.3              | 14.8              | 0.097  | 1183                | 1200                 |
| $A_{t2}-L_o$ | 48.0              | 44.3              | 27.4              | 17.9              | 0.060  | 1065                | 1058                 |
| $B_{t1}-L_d$ | 38.8              | 63.5              | 25.2              | 14.7              | 0.082  | 1231                | 1227                 |
| $B_{t1}-L_o$ | 46.6              | 44.9              | 25.8              | 17.4              | 0.027  | 1047                | 1049                 |
| $B_{t2}-L_d$ | 39.3              | 60.6              | 25.6              | 14.9              | 0.078  | 1191                | 1183                 |
| $B_{t2}-L_o$ | 45.9              | 44.0              | 23.7              | 17.0              | 0.028  | 1010                | 1015                 |

## Lipid volume calculation

The calculated lipid volumes of the ternary mixtures described in Material and Methods, were compared to experimentally determined volumes using the density sound analyzer DSA5000 (Anton Paar, Graz, Austria). Specifically, experiments yielded the partial specific volume (see e.g. (3))

$$v_s = \frac{1}{\rho_0} \left( 1 - \frac{\rho_s - \rho_0}{c} \right), \quad (1)$$

where  $\rho_0$  is the density of the solvent,  $\rho_s$  density of the solution and  $c$  the solute concentration. The experimental volume per molecule is then calculated according to Greenwood et al. as (4):

$$V'_L = \frac{v_s}{N_A} (x_1 M_1 + x_2 M_2 + x_3 M_3), \quad (2)$$

where  $N_A$  is Avogadro's number,  $x_i$  molar fraction and  $M_i$  the molecular weights.

Alternatively, volumes can be calculated by (5)

$$V_L(T) = V_H + n_{CH} V_{CH}(T) + n_{CH_2} V_{CH_2}(T) + n_{CH_3} V_{CH_3}(T), \quad (3)$$

where the head group volume  $V_H$  is kept fixed at  $319 \text{ \AA}^3$ .  $V_{CH}$ ,  $V_{CH_2}$ ,  $V_{CH_3}$  are the segmental volumes of methine-, methylene-, and methyl groups and  $n_{CH}$ ,  $n_{CH_2}$ ,  $n_{CH_3}$  are the number of CH, CH<sub>2</sub>, CH<sub>3</sub> groups per lipid molecule, respectively. A detailed description of the temperature dependence can be found in (5). Experimental and calculated molecular volumes were found to agree within experimental uncertainties (Table S2).

## Estimation of temperature dependent compositional changes

Assuming that the inclination of tielines remains constant with temperature, tieline endpoints can be estimated using the lever rule. Specifically, we determined the distances between tieline midpoints and tieline endpoints  $\overline{Ld}$ ,  $\overline{Lo}$  using

$$c_{Ld}(T) = \frac{\overline{Lo}(T)}{\overline{tl}(T)} \quad (4)$$

$$c_{Lo}(T) = 1 - c_{Ld}(T) = \frac{\overline{Ld}(T)}{\overline{tl}(T)}, \quad (5)$$

where  $\overline{tl}(T)$  is the overall tieline length.  $\overline{tl}$  was estimated to change with temperature in proportion to the  $L_o$  fraction. Arbitrary functions were used to fit  $c_{Lo}(T)$  data. Results are shown in Fig. S9. Estimates reproduce the asymmetric closing-in of the phase boundaries reported previously (6), which originate here from the measured increase of the  $L_d$  phase fraction.

Uppamoochikkal et al. (1) reported a small but significant increase of the tieline inclination angle with temperature. Therefore we checked, how this would influence our structural results. Note that this concerns only the area per lipid  $A$ , as results for all other parameter do not depend on knowing the specific lipid compositions of  $L_o/L_d$  domains. Hence, we tested several functions for the temperature behavior of the tielines, without finding any effects on the relative changes of  $A$ . Changes were observed for absolute values of  $A$  at the higher temperatures. However, they remained small, i.e. within  $\pm 3\%$ .

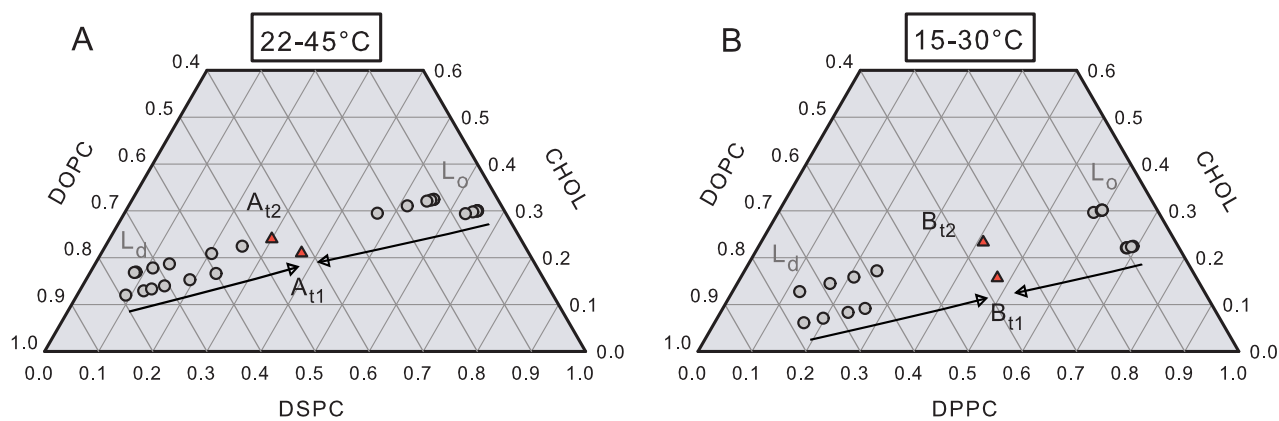

Figure S9: Estimated temperature dependence of tieline endpoints for DOPC/DSPC/CHOL (panel A) and DOPC/DPPC/CHOL (panel B). Triangles represent starting points at the tieline midpoints. Circles indicate the corresponding estimated tieline endpoints, which shift toward the midpoints as temperature is increased. The temperature increment was 5 °C only the first temperature step for DOPC/DSPC/CHOL was smaller (3 °C). Note that  $L_d$  endpoints approach tieline midpoints more rapidly than  $L_o$  endpoints.



## Supporting References

1. Uppamoochikkal, P., S. Tristram-Nagle, and J. F. Nagle, 2010. Orientation of tie-lines in the phase diagram of DOPC:DPPC:cholesterol model biomembranes. *Langmuir* 26:17363–17368.
2. Heberle, F. A., J. Wu, S. L. Goh, R. S. Petruzielo, and G. W. Feigenson, 2010. Comparison of three ternary lipid bilayer mixtures: FRET and ESR reveal nanodomains. *Biophys. J.* 99:3309–3318.
3. Hodzic, A., M. Rappolt, H. Amenitsch, P. Laggnier, and G. Pabst, 2008. Differential modulation of membrane structure and fluctuations by plant sterols and cholesterol. *Biophys. J.* 94:3935–3944.
4. Greenwood, A. I., S. Tristram-Nagle, and J. F. Nagle, 2006. Partial molecular volumes of lipids and cholesterol. *Chem. Phys. Lipids* 143:1–10.
5. Koenig, B. W., and K. Gawrisch, 2005. Specific volumes of unsaturated phosphatidylcholines in the liquid crystalline lamellar phase. *Biochim. Biophys. Acta.* 1715:65–70.
6. Buboltz, J. T., C. Bwalya, K. Williams, and M. Schutzer, 2007. High resolution mapping of phase behavior in a ternary lipid mixture: Do lipid-raft phase boundaries depend on sample-prep procedure? *arXiv:0706.1374 [physics]* arXiv: 0706.1374.
