# Supplementary material for: In Situ Determination of Structure and Fluctuations of Coexisting Fluid Membrane Domains
Source: PubMed Central journal article supplement (PMC4336378; doi:10.1016/j.bpj.2014.11.3488), 2015-02-17
Supplement: mmc2.pdf [file mmc2.pdf]

## Article

# In Situ Determination of Structure and Fluctuations of Coexisting Fluid Membrane Domains

Peter Heftberger,<sup>1,2</sup> Benjamin Kollmitzer,<sup>1,2</sup> Alexander A. Rieder,<sup>1,2</sup> Heinz Amenitsch,<sup>3</sup> and Georg Pabst<sup>1,2,\*</sup><sup>1</sup>Biophysics Division, Institute of Molecular Biosciences, University of Graz, NAWI Graz, Graz, Austria; <sup>2</sup>BioTechMed-Graz, Graz, Austria; and<sup>3</sup>Institute of Inorganic Chemistry, Graz University of Technology, Graz, Austria

**ABSTRACT** Biophysical understanding of membrane domains requires accurate knowledge of their structural details and elasticity. We report on a global small angle x-ray scattering data analysis technique for coexisting liquid-ordered ( $L_o$ ) and liquid-disordered ( $L_d$ ) domains in fully hydrated multilamellar vesicles. This enabled their detailed analysis for differences in membrane thickness, area per lipid, hydrocarbon chain length, and bending fluctuation as demonstrated for two ternary mixtures (DOPC/DSPC/CHOL and DOPC/DPPC/CHOL) at different cholesterol concentrations.  $L_o$  domains were found to be  $\sim 10$  Å thicker, and laterally up to  $20$  Å<sup>2</sup>/lipid more condensed than  $L_d$  domains. Their bending fluctuations were also reduced by  $\sim 65\%$ . Increase of cholesterol concentration caused significant changes in structural properties of  $L_d$ , while its influence on  $L_o$  properties was marginal. We further observed that temperature-induced melting of  $L_o$  domains is associated with a diffusion of cholesterol to  $L_d$  domains and controlled by  $L_o/L_d$  thickness differences.

## INTRODUCTION

Since the formulation of the raft model in 1997 by Simons and Ikonen (1) significant scientific efforts have been devoted to the characterization of physical properties of liquid-disordered  $L_d$  and liquid-ordered  $L_o$  domains (2–11). Membrane rafts are thought to be small (nanoscopic) and highly dynamic platforms enriched in sphingolipids and cholesterol, enabling diverse cellular functions, but have so far escaped any direct visualization in live cells (5,12). Hence, the existence of rafts remains a highly controversial issue. For example Frisz et al. (13,14), using secondary ion mass spectrometry on fibroblasts, observed sphingolipid domains, in which cholesterol was evenly distributed throughout the membrane, thus challenging the standard raft hypotheses.

In contrast to natural membranes, domains in lipid-only systems can grow up to several micrometers in size, enabling their detection (e.g., by optical microscopy (15)) and study with respect to the physics pertaining to their stability, size, or effect on protein sorting, to name but a few examples (8). One of the parameters involved in, e.g., protein sorting, is the difference in thickness between the  $L_o$  and  $L_d$  domains and the corresponding match to the protein's transmembrane region (see, e.g., Killian (16) and Pabst (17)).

To address these issues, diverse experimental and theoretical techniques have been employed to explore structural

and elastic properties of  $L_o/L_d$  phases (see, e.g., the literature (18–32)). Scattering experiments are of particular interest in this respect, because they allow for a label-free determination of membrane structure and dynamics (33). However, contrast between  $L_o$  and  $L_d$  domains is low. This can be addressed, for example, by contrast variation, using neutron scattering (34). In recent years, this technique has been used largely by Katsaras and coworkers, showing, e.g., the coupling of domain size and membrane thickness mismatch between  $L_o$  and  $L_d$  (35).

Alternatively, early x-ray experiments used Triton X-100 (Dow Chemical, Midland, MI) to separate detergent-resistant from detergent-soluble membranes, respectively (22). However, the application of detergents on membranes may adversely influence the mixing behavior of membrane lipids (36), limiting the applicability of this approach.

Another possibility, which is being explored in this work, makes use of the experimental finding that macroscopic domains are typically in registry in multilamellar systems (see, e.g., Chen et al. (28), Tayebi et al. (37), and Karmakar et al. (38)), meaning:  $L_o$  and  $L_d$  domains form lamellar lattices with distinct Bragg peaks. The challenges to be met here are 1) overlapping  $L_o/L_d$  Bragg reflections, in particular at low scattering angles; and 2) the small number of solid orders (only 2–3) displayed by  $L_d$  phases in fully hydrated multilamellar vesicles (MLVs), limiting the structural information content when only Bragg peak intensities are analyzed (39).

The latter issue is particularly well known for single-phase fluid bilayers, and has led to the development of a global SAXS data analysis technique that takes into account both Bragg peaks and diffuse scattering (39). Most recently,

Submitted October 16, 2014, and accepted for publication November 24, 2014.

\*Correspondence: [georg.pabst@uni-graz.at](mailto:georg.pabst@uni-graz.at)

This is an open access article under the CC BY license (<http://creativecommons.org/licenses/by/4.0/>).

Editor: Anne Kenworthy.

© 2015 The Authors

0006-3495/15/02/0854/9 \$2.00

<http://dx.doi.org/10.1016/j.bpj.2014.11.3488>

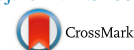

we have advanced the technique by incorporating the scattering density profile (SDP) model (40), enabling us to determine membrane structure and bending fluctuations from homogeneous MLVs at high resolution (41).

To access coexisting fluid domains in MLVs, the global SAXS data analysis needs to be further extended. This was achieved in this work by assuming a linear combination of scattering intensities originating from  $L_o$  and  $L_d$  phases. The method was applied to two ternary mixtures, with the high-melting lipids DPPC (dipalmitoylphosphatidylcholine) or DSPC (distearoylphosphatidylcholine), the low-melting lipid DOPC (dioleoylphosphatidylcholine), and CHOL (cholesterol). Summaries of the studied samples and applied nomenclature are given in Fig. 1 and Table S1 in the Supporting Material.

We observed distinct structural and elastic properties of  $L_o$  and  $L_d$  domains as a function of temperature and composition (lipid chain length and cholesterol concentration).

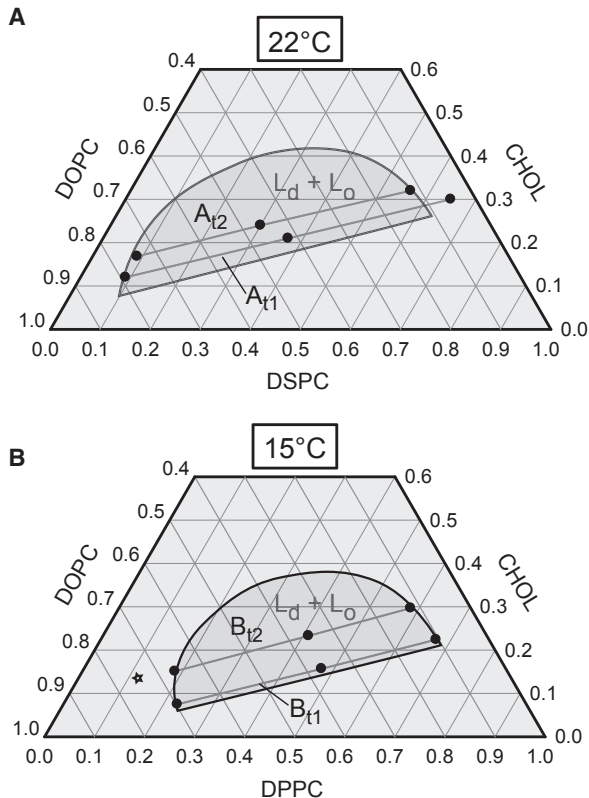

FIGURE 1 Overview of samples studied in this work. (Solid circles) Their location is shown in previously reported compositional phase diagrams of (A) DOPC/DSPC/CHOL (50) and (B) DOPC/DPPC/CHOL (49). In fluid-fluid phase coexistence regions (dark-shaded areas), demixing into  $L_o$  and  $L_d$  domains occurs along tielines. Two tielines for each system ( $A_{t1}$ ,  $A_{t2}$  and  $B_{t1}$ ,  $B_{t2}$ ) with three different compositions at the  $L_d$ ,  $L_o$  endpoints and the tieline center were studied (see Table S1 for detailed lipid composition). Note that tieline endpoints for  $L_o$  on  $A_{t1}$  and  $L_d$  on  $B_{t2}$  (star) are outside previously reported phase boundaries. This is either due to updates in phase boundaries for isolated tielines ( $A_{t1}$  (35)) or experiments performed in this study ( $B_{t2}$ , see Results).

Most interestingly, we found that increased cholesterol concentrations reduce the thickness difference between  $L_d$  and  $L_o$  domains, which leads to a decrease of line tension and in turn promotes the temperature induced melting of  $L_o$  domains.

## MATERIALS AND METHODS

### Sample preparation

DPPC, DSPC, and DOPC were purchased from Avanti Polar Lipids (Alabaster, AL), and cholesterol was obtained from Sigma-Aldrich (Vienna, Austria). All lipids were used without further purification, with all chemicals being of professional analysis quality. Lipid stock solutions were prepared by dissolving weighted amounts of dry lipid in chloroform/methanol (2:1, v/v) and then mixed at appropriate ratios (see Table S1 for all samples and their corresponding compositions). Subsequently, lipid solutions were dried under a stream of nitrogen and then placed under vacuum for ~12 h, forming a thin lipid film on the bottom of glass vials. Dry films were hydrated using 18 MΩ/cm water and incubated for 6 h above the main transition temperature of the high-melting lipid (DPPC or DSPC), repetitively cycling vortex-mixing and freeze-thaw procedures using liquid  $N_2$ . The final lipid concentration for each sample was 50 mg/mL. All samples were prepared at least twice (with a time delay of several weeks) starting from pure lipid powders to check for reproducibility. Lattice constants ( $d$ -values) varied by  $< \pm 0.5\%$ . Furthermore, thin layer chromatography on randomly selected samples revealed no decomposition of the samples into lyso lipids or free fatty acids.

### Small angle x-ray scattering

X-ray scattering data were acquired at the Austrian SAXS beamline Elettra Trieste, Trieste, Italy, using 8 keV photons. Diffraction profiles were detected utilizing a Mar300-image-plate detector (MarResearch, Norderstedt, Germany) and calibrated using silver behenate. Lipid dispersions were taken up in 1-mm-thick quartz capillaries and inserted into a multiposition sample holder. All samples were equilibrated for a minimum of 10 min before measurement using a circulating water bath. The exposure time was set to 30 s. Scattering patterns were integrated using the program FIT2D (42). Background scattering originating from capillaries, water, and air was subtracted (43), and data sets were normalized using the transmitted intensity, which was measured by a photodiode placed in the beam stop.

### Analysis of coexisting domains

To analyze the scattering profile of MLVs exhibiting  $L_o/L_d$  phase coexistence, we adopted the full- $q$ -range model by Heftberger et al. (41) for homogeneous bilayers. For the latter systems, the scattered intensity is given by

$$I(q) = \frac{1}{q^2} [ |F(q)|^2 S(q) (1 - N_{\text{diff}}) + |F(q)|^2 N_{\text{diff}} ], \quad (1)$$

where  $q = 4\pi\sin\theta/\lambda$  is the scattering vector,  $\lambda$  is the wavelength,  $2\theta$  is the scattering angle relative to the incident beam, and  $N_{\text{diff}}$  is the diffuse scattering originating from positionally uncorrelated bilayers. The structure factor  $S(q)$  is given by the Caillé theory (39,44–46), yielding access to bending fluctuations via the Caillé parameter

$$\eta \propto \frac{T}{\sqrt{K_C B}},$$

with  $K_C$  as the bilayer bending rigidity and  $B$  as the bulk modulus of interactions (39). The form factor  $F(q)$  is the Fourier transform of the electron density profile of a bilayer, described in terms of the SDP model (40).

Neglecting putative cross-correlations between  $L_o$  and  $L_d$  domains, the scattered intensity of coexisting fluid domains can be modeled by a linear combination of the individual  $L_o/L_d$  intensities,

$$I(q) = \frac{1}{q^2} [(1 - N_{\text{diff}})I_{\text{corr}}(q) + N_{\text{diff}}I_{\text{uncorr}}(q)], \quad (2)$$

where

$$I_{\text{corr}}(q) = |F_{Ld}(q)|^2 S_{Ld}(q) c_{Ld} + |F_{Lo}(q)|^2 S_{Lo}(q) (1 - c_{Ld})$$

and

$$I_{\text{uncorr}}(q) = |F_{Ld}(q)|^2 c_{Ld} + |F_{Lo}(q)|^2 (1 - c_{Ld})$$

are the scattering intensities originating from positionally correlated and uncorrelated bilayers, respectively. The subscripts  $L_o$  and  $L_d$  denote the individual contributions of the domains to  $S(q)$  and  $F(q)$ , and  $c_{Ld}$  refers to the  $L_d$  phase fraction in the sample. Analysis of the scattered intensity of coexisting phases in terms of this model yields bilayer structural parameters and bending fluctuations simultaneously for  $L_o$  and  $L_d$ . A strict requirement for its application is that domains are in registry in the direction normal to the bilayer plane, meaning: two distinct lamellar lattices need to be observed. This is typically the case for macroscopic domains, observed for example when diunsaturated lipids such as DOPC are used as low-melting membrane component in ternary raftlike mixtures (28,37,38).

The SDP model, used to describe the form factors, parses the bilayer lipids into quasi-molecular fragments and calculates their volume probability distributions. The model was originally designed for determining single lipid component bilayers (40,47). Pan et al. (48) extended the SDP analysis to binary lipid mixtures containing cholesterol. To this end the contribution of cholesterol was merged with that of methylene ( $\text{CH}_2$ ) groups, which was recently also applied successfully to homogenous MLVs (41). Because our studied  $L_o$  and  $L_d$  domains contain different amounts of three lipids, effective lipid molecules were constructed for the SDP description, by first merging the contributions from the unsaturated and saturated lipids and then adding cholesterol to the  $\text{CH}_2$  regime as described above. Saturated and unsaturated lipids differ with respect to the number of  $\text{CH}_2$  and methine ( $\text{CH}$ ) groups. Due to the absence of scattering contrast between  $\text{CH}$  and  $\text{CH}_2$  for x-rays, these groups can be merged (40,41). Our final parsing approach consisted of five groups for each phase, composed of the following: 1)  $\text{CholCH}_3$  (Choline methyl), 2) PCN (Phosphate +  $\text{CH}_2\text{CH}_2\text{N}$ ), 3) CG (Carbonyl + glycerol) groups, 4)  $\text{CH}_2$ , and 5)  $\text{CH}_3$  methyl groups at the bilayer center.

This approach is further justified by its compatibility to previously reported molecular dynamics (MD) data (31), as demonstrated in Fig. 2. For details of the functional forms used to describe the individual groups, we refer to the literature (40,41,48). As detailed previously (41), a genetic algorithm was applied for fitting the global model to experimental data.

Membrane structural parameters such as hydrocarbon chain length  $d_C$ , Luzzati thickness  $d_B$ , water layer thickness  $d_W$ , and the area per lipid  $A = 2V_L/d_B$  were defined and calculated from the SDP profiles as described in Heftberger et al. (41).  $V_L$  is the total lipid volume, which is assumed to be given by the molecular-weighted average

$$V_L(T) = \sum_i x_i(T) V_i(T), \quad (3)$$

where  $x_i$  values are the lipid molar ratios in  $L_d$  and  $L_o$  taken from Uppamoochikkal et al. (49) and Heberle et al. (50),  $V_i$  values are the corresponding molecular lipid volumes, and  $T$  is the temperature. Temperature-dependent  $V_i$  values were calculated according to the method of Koenig and Gawrisch (51), and the volume of cholesterol within lipid bilayers was taken to be

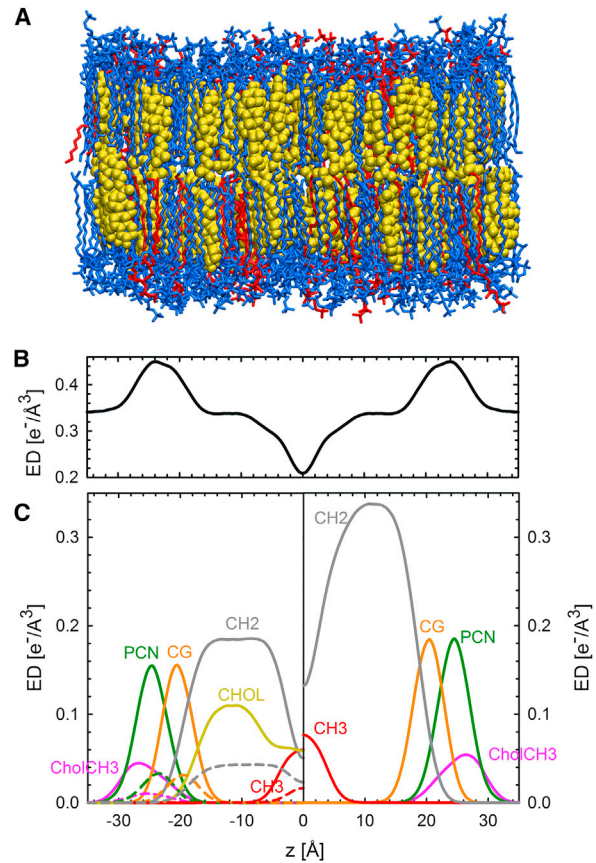

FIGURE 2 Parsing scheme of ternary lipid mixtures based on MD simulations of an  $L_o$  phase of DOPC/DPPC/CHOL (31). (A) Snapshot of the equilibrated system. DPPC lipids, blue; DOPC, red; cholesterol, yellow. (B) Calculated electron density profile. (C) Electron densities of molecular groups, calculated using SIMTOEXP (70). (Left) Individual contributions of DPPC (solid lines) and DOPC (dashed lines) for the CholCH<sub>3</sub>, PCN, CG, CH<sub>2</sub>, and CH<sub>3</sub> groups. (Yellow line) Contribution of cholesterol. (Right) Condensed parsing scheme after merging individual contributions as detailed in the main text. To see this figure in color, go online.

$630 \text{ \AA}^3$  (52). Calculated tieline endpoint  $V_L$  were in good agreement ( $<2\%$ ) with experimental values determined by dilatometry (Supporting Material). Note that dilatometry yields a globally averaged value for the lipid volume and is thus not able to discern between  $L_o$  and  $L_d$  in the phase coexistence regime. Thus experimental  $V_L$  can be obtained for tieline endpoints, only. The temperature dependence of  $x_i$  was estimated by the lever rule using the experimentally determined  $L_d$  and  $L_o$  fractions ( $c_{Ld}$  and  $1 - c_{Ld}$ ), assuming 1) that the inclination of the tieline remains constant, and 2) that the tieline length changes according to the  $L_o$  fraction with temperature (Supporting Material).

## RESULTS AND DISCUSSION

### Establishing the global analysis for two phases

Our strategy to validate this analysis was as follows. 1) We evaluated tieline endpoint SAXS data. At endpoints, either  $L_o$  or  $L_d$  should exist as a single phase, thus allowing application of our previous analysis for homogeneous MLVs (41). 2) The phase coexistence model was applied to a

composition close to the tieline midpoint and the achieved results were compared to endpoint data.

Phase boundaries, in particular, are subject to considerable uncertainties (8,49,53–55), whereas recent tieline orientation data are considered to be more reliable. In this study, we applied previously published compositional phase diagrams from Heberle et al. (50) and Uppamoochikkal et al. (49). Note that Uppamoochikkal et al. (49) used the phase diagram reported by Veatch et al. (54), and constructed tielines using x-ray scattering on oriented lipid films.

Our measurement strategy allowed for an independent check of these data, as follows: 1) Bragg peaks of all samples measured per tieline are required to overlap, if tieline orientation is correct (49); and 2) only a single lamellar lattice should be observed at the phase boundaries.

For all samples, including replicas,  $L_o/L_d$  peak positions for tieline midpoints and endpoints matched, reassuring not only tieline orientation data, but also our sample preparation. The  $L_d$  endpoints of DOPC/DPPC/CHOL contained significant residual scattering from an  $L_o$  phase, revealing errors in the reported phase boundary. However, because  $L_o$  peaks overlapped with those of the  $L_o$  endpoint, we were able to subtract the  $L_o$  contribution (Fig. S1 in the Supporting Material). In independent experiments, using a laboratory x-ray camera, we determined for  $B_{12}$  a new  $L_d$  endpoint by measuring several samples along the tieline until the  $L_o$  contributions vanished. The new endpoint composition is 0.748/0.124/0.128 (Fig. 1); corresponding SAXS data are shown in Fig. S2.

Fig. 3 details the results and analysis of the  $A_{11}$  tieline. The  $L_d$  endpoint in this study showed some residual  $L_o$  contribution. However, it was small enough to be neglected. Global fits to tieline endpoints and midpoints show that our model is able to capture both the single-phase and two-phase coexistence, respectively. Insets to Fig. 3 show the volume probability distributions of individual quasi-molecular groups (see previous section) for  $L_o$ ,  $L_d$  endpoints and the resulting electron density (ED) profiles for the coexisting case. The absolute ED in the hydrocarbon chain region of the  $L_o$  phase is significantly higher than in  $L_d$ . This can be explained by the higher amount of cholesterol in the  $L_o$  phase, with substantial ED contributions from the sterol ring.

All structural parameters for coexisting domains agreed remarkably to tieline endpoints (Tables 1 and S2), thereby validating our analysis. For example, the membrane thickness  $d_B$  for  $L_d$  and  $L_o$  endpoints is 37.5 and 49.7 Å, respectively. This compares well to  $d_B = 38.1$  and 48.6 Å for  $L_d$  and  $L_o$  in the coexistence regime, meaning: differences are within  $<1$  Å. Note that height differences  $\Delta d_B$  between  $L_d$  and  $L_o$  domains are in the same range as those reported between detergent-resistant and detergent-soluble membranes (22).

The two-phase analysis was further tested by checking whether a decrease of the hydrocarbon chain length of the

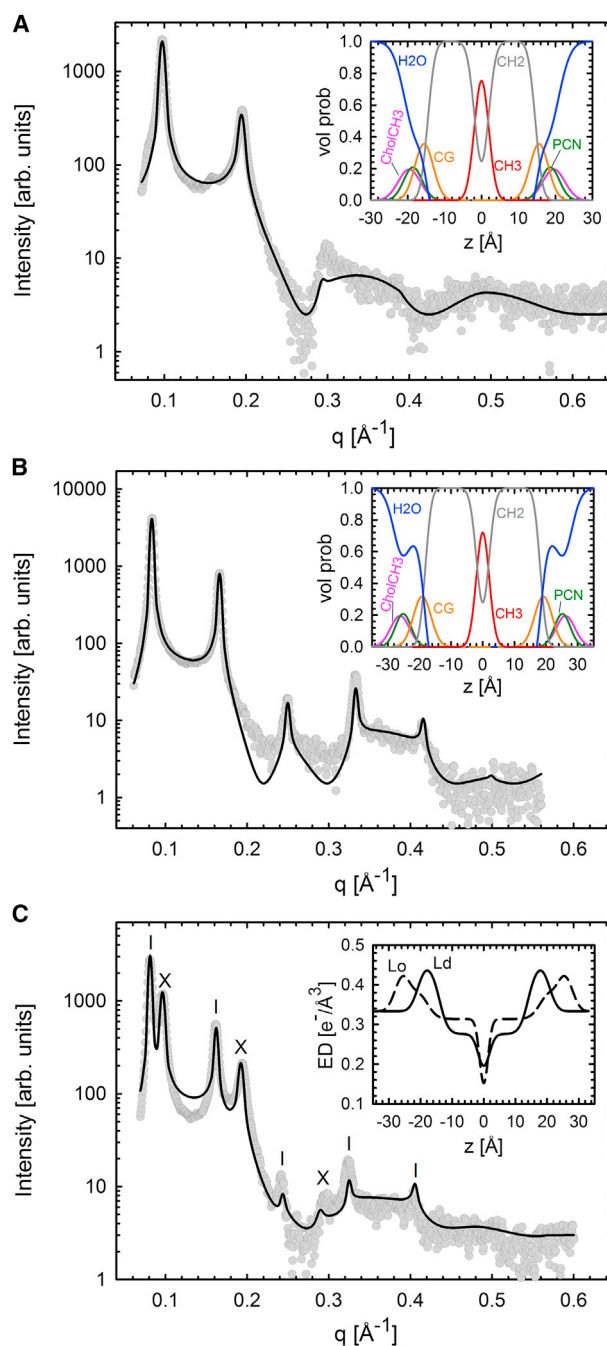

FIGURE 3 Validation of the global analysis for two coexisting phases for the  $A_{11}$  tieline ( $T = 22^\circ\text{C}$ ). (A and B) Fits to  $L_d$  and  $L_o$  endpoint data, respectively. (Insets, both panels) Derived volume probability distributions. (C) Best fit to SAXS data at the  $A_{11}$  tieline midpoint. Bragg reflections of  $L_o$  (dashes) and  $L_d$  (crosses) domains. (Inset) ED profiles for  $L_o$  and  $L_d$  phases. To see this figure in color, go online.

mixture's high-melting lipid leads to reasonable changes in domain structure. Exchanging DSPC with DPPC affected mainly the structure of the  $L_o$  phase. Picking for example the  $t1$  tielines,  $d_B$  decreased by 2.6 Å, whereas only a minor decrease of 0.6 Å was found for  $L_d$ . Similar changes were found for other tielines, including  $d_C$ -values (Table 1).

**TABLE 1** Structural results and bending fluctuations for coexisting  $L_d/L_o$  domains

| Term          | $d_B$ | $A$  | $d_w$ | $d_C$ | $\eta$ |
|---------------|-------|------|-------|-------|--------|
| $A_{t1}(L_d)$ | 38.5  | 63.1 | 26.6  | 14.5  | 0.091  |
| $A_{t1}(L_o)$ | 49.8  | 43.2 | 27.6  | 18.8  | 0.030  |
| $A_{t2}(L_d)$ | 39.2  | 60.3 | 26.5  | 14.9  | 0.092  |
| $A_{t2}(L_o)$ | 49.2  | 43.1 | 26.8  | 18.5  | 0.029  |
| $B_{t1}(L_d)$ | 37.9  | 64.9 | 26.0  | 14.2  | 0.074  |
| $B_{t1}(L_o)$ | 47.2  | 44.4 | 25.1  | 17.7  | 0.021  |
| $B_{t2}(L_d)$ | 38.9  | 61.2 | 25.8  | 14.7  | 0.068  |
| $B_{t2}(L_o)$ | 46.4  | 43.5 | 23.3  | 17.3  | 0.024  |

Parameter uncertainties are  $<2\%$ .

Our findings are in excellent agreement with tieline orientation (Fig. 1); because the high-melting lipid is located in  $L_o$  domains, we observe a thinning by exchanging DSPC to DPPC, which contains two  $\text{CH}_2$  groups less per acyl chain. Kučerka et al. (47) reported a similar thickness difference for pure DSPC and DPPC bilayers.  $L_d$  phases contain mainly DOPC and are consequently barely effected by the lipid exchange. Further structural parameters for  $L_d$  (Table 1) are close to that of pure DOPC (40).

Finally, we compare areas per lipid,  $A$ , which differ significantly between  $L_d$  and  $L_o$  phases (Table 1). The  $L_d$  domains exhibited  $A$  values between 60 and 65  $\text{\AA}^2$ , which is in the range of values reported for fluid single lipid bilayers (40,47). Areas are  $\sim 20 \text{\AA}^2$  smaller for  $L_o$  domains. The main reason for this difference is the condensing effect of cholesterol, which was previously reported for several binary phosphatidylcholine/cholesterol mixtures (48,56–58) and is now also observed for coexisting  $L_o/L_d$  domains. Another manifestation of this ordering effect is the decrease of the bending fluctuation parameter from  $\eta \sim 0.08$  ( $L_d$ ) to  $\sim 0.03$  ( $L_o$ ).

Thus, concluding this section: our global SAXS data analysis yields, within typical uncertainties of the SDP model, robust high-resolution results for structure and fluctuations of coexisting  $L_o/L_d$  domains. This allows us to obtain reliable insights on changes of these parameters, e.g., as a function of composition or temperature. Results of such experiments are presented in the following sections.

### Effect of cholesterol on domains

To study the influence of raising cholesterol concentration, we compare the  $t1$  and  $t2$  tieline midpoints for both ternary mixtures. Scattering profiles and fits are plotted in Fig. 3 (Figs. S3, S4, and S5), while results for structural and elastic parameters are presented in Table 1. For both systems studied,  $d$  increased by  $\sim 0.75 \text{\AA}$  for  $L_d$  domains, but decreased by  $\sim 2 \text{\AA}$  for  $L_o$  upon increasing cholesterol content. Our analysis revealed that the increase of  $d$  for  $L_d$  is mainly due to a thickening of its bilayer, whereas only approximately one-third of the decrease of  $d$  for  $L_o$  can be attributed to  $d_B$ . A decrease of  $d_B$  for  $L_o$  upon increasing

cholesterol concentration may seem counterintuitive, but the marginal additional ordering effect due to more cholesterol is overcompensated by a reduction of the high-melting lipid concentration. Most of the change in  $d$  for  $L_o$  is due to a decrease of the interstitial water layer ( $1\text{--}2 \text{\AA}$ ), which may originate either from an increase in net attractive forces, or a decrease in net repulsive forces between  $L_o$  domains. This effect cannot be attributed to an increased bending rigidity due to the higher cholesterol content (59), because the fluctuations did not decrease (Table 1). Instead, a decrease of hydration or an increase of van der Waals forces might be the reason.

The area per lipid was found to be smaller for  $L_d$  domains of the  $t2$  tielines (Table 1), which can be attributed to the well-known condensing effect of cholesterol (58). For  $L_o$  domains, changes for  $A$  were found to be insignificant (within experimental uncertainty). However, it is interesting to note that the variation of  $A$  for  $L_o$  even across DOPC/DPPC/CHOL and DOPC/DSPC/CHOL is within  $\pm 2\%$ . This indicates that the average value  $A \sim 43.6 \text{\AA}^2$  could be the tightest possible packing of lipids in the  $L_o$  phase. More structural data on  $L_o$  would certainly be needed to validate this notion.

### Temperature dependence of $L_o/L_d$ domains

Starting from the reported compositional phase diagrams (Fig. 1), we increased temperature in steps of  $5^\circ\text{C}$  until we reached a homogeneous phase. The transition is observed as a merging of the  $L_o$  and  $L_d$  lattices into a single  $L_d$  phase lattice (Fig. 4). For DOPC/DSPC/CHOL, the transition at  $T_C$  occurred between 45 and  $50^\circ\text{C}$ , and for DOPC/DPPC/CHOL, between 30 and  $35^\circ\text{C}$ . Note that our temperature resolution does not allow us to determine  $T_C$  with high accuracy. Fig. 5 A compares the results for  $d_B$  of  $A_{t1}$  and  $B_{t1}$ . The  $L_o$  phase of  $B_{t1}$  was found to be  $3 \text{\AA}$  thinner than that of  $A_{t1}$ . Because changes with temperature are similar for both  $t1$  and  $t2$  tielines (Figs. 5 and S6), we can therefore limit the discussion to the  $t1$  tielines. In the temperature range of  $22\text{--}45^\circ\text{C}$   $d_B$  of  $L_d$  domains increased monotonously by  $\sim 1\text{--}1.5 \text{\AA}$ , whereas  $d_B$  for  $L_o$  decreased at the same time by  $2 \text{\AA}$ . Close to  $T_C$ , these changes are significantly accelerated. Above the transition temperature,  $d_B$  is similar to that of the  $L_d$  phase just below  $T_C$ . Interestingly,  $d_B$  is approximately equal for DSPC- and DPPC-containing samples above  $T_C$ , including the  $t2$  tielines (Fig. S6) despite the difference in hydrocarbon chain length.

The thickness of single-phase fluid lipid bilayers typically decreases with increasing temperature (47,60,61). Thus, the thickening of the  $L_d$  domains upon approaching  $T_C$  from below is surprising. Davis and Schmidt (23) recently suggested, based on NMR data, that the cholesterol fraction in  $L_o$  decreases with temperature. Consequently,  $L_d$  would get enriched in cholesterol. Because of the associated condensation effect of cholesterol, one would then expect

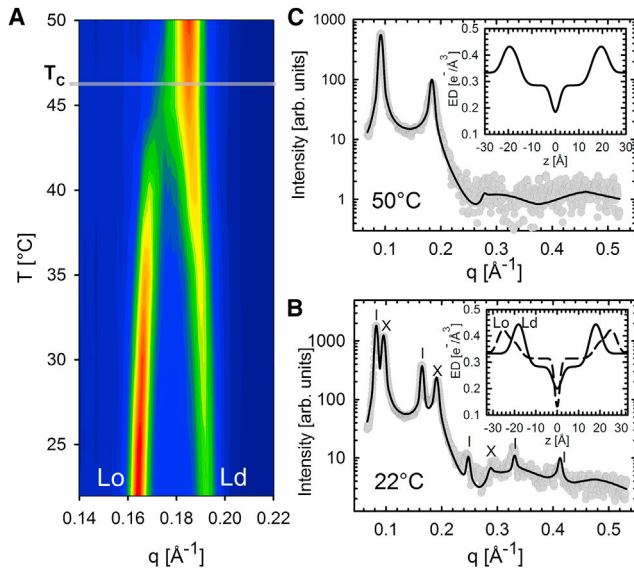

FIGURE 4 Temperature behavior of DOPC/DSPC/CHOL (tiele  $t_2$ ) as revealed by SAXS. (A) Contour plot of the second-order Bragg reflections indicated as  $L_o$  and  $L_d$ . Note that the smooth appearance of data is due to an interpolation procedure between the individual frames. The critical temperature  $T_c$  is between 45 and 50°C. At  $>T_c$ , only a single lamellar lattice is observed. (B) Measured scattering at 22°C with the indicated Bragg reflections for  $L_o$  (dashes) and  $L_d$  (crosses) domains. (C) The same, for 50°C. (Solid lines) Best fits. (Insets, both panels) Resulting ED profiles for  $L_o$  and  $L_d$  phases. To see this figure in color, go online.

an increase of the  $L_d$  domain thickness. Our results consequently corroborate this scenario.

The area per lipid is inversely proportional to  $d_B$ . Hence the temperature changes of  $A$  are similar to  $d_B$ , but just with inverted trends, i.e.,  $A$  decreases for  $L_d$  and increases for  $L_o$ , as observed in Fig. 5 B. We further note that areas above  $T_c$  are alike for all systems and tielines studied, which appears reasonable in view of the similar  $A$ -values reported for single-component DPPC and DSPC membranes (47). Changes of the water layers in turn appear to be decoupled from the trends of  $d_B$  and  $A$ . We found a general increase of  $d_W$  for  $L_d$  domains and a decrease for  $L_o$  domains (Fig. 5 C) below  $T_c$ , with changes close to  $T_c$  being more pronounced for the  $L_o$  phase. These findings are not straightforward to explain, in particular because the Caillé parameter did not show a strong increase of bending fluctuations for  $L_d$ , or decrease for  $L_o$ , respectively. Instead, an overall decrease in  $\eta$  was found for  $L_d$  (Fig. 6) and an increase in the vicinity of  $T_c$  for  $L_o$ . These two trends can be explained by the temperature-driven diffusion of cholesterol to  $L_d$ , as discussed above. Specific changes in  $d_W$  in turn appear to be caused by other influences on intermembrane interactions. Additional experiments, such as a combination of SAXS with osmotic stress (62), are needed to address this issue properly.

Melting of  $L_o$  domains can be further assessed by  $c_{Ld}$ , corresponding to the  $L_d$  phase fraction (Eq. 2). All studied systems show a steady increase of  $c_{Ld}$  as  $T_c$  is approached from

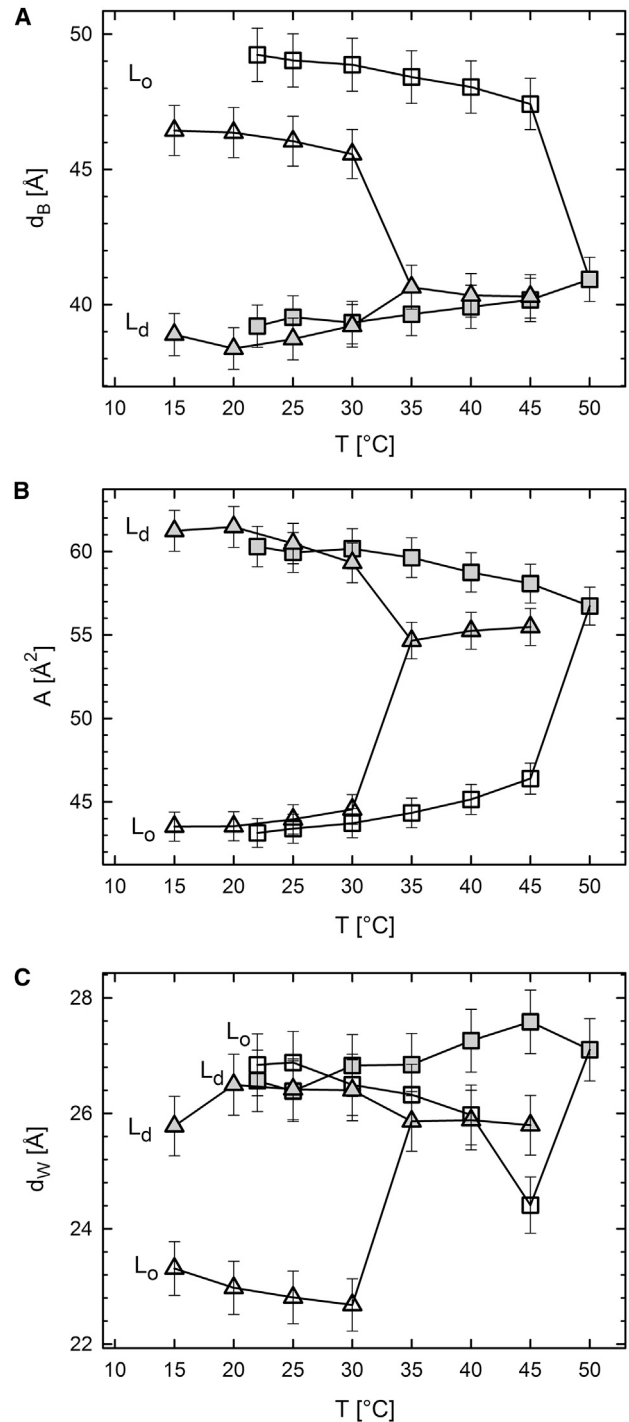

FIGURE 5 Temperature dependence of structural parameters of DOPC/DSPC/CHOL (squares) and DOPC/DPPC/CHOL (triangles), starting from the  $t_1$  tieline midpoints (Fig. 1). (A) Bilayer thickness, (B) area per lipid, and (C) water layer thickness, for  $L_d$  (solid symbols) and  $L_o$  (open symbols) domains as a function of temperature.

below, while the  $t_2$  composition of DOPC/DSPC/CHOL exhibited the largest overall  $L_d$  fraction (Fig. 7). The increase of  $c_{Ld}$  also signifies that the  $L_d$  tieline endpoints approach the chosen midpoints more rapidly than the  $L_o$  endpoints.

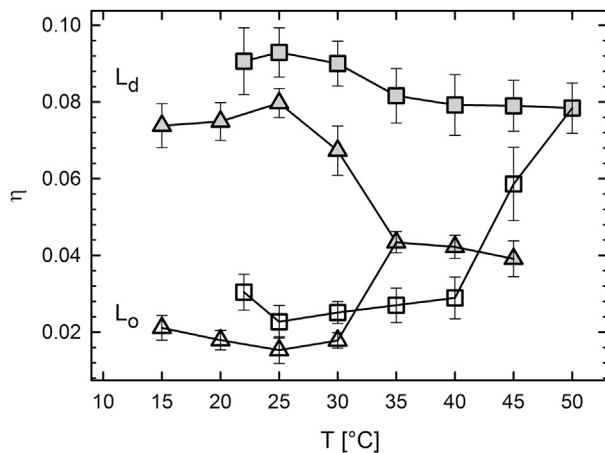

FIGURE 6 Temperature dependence of bending fluctuations of coexisting DOPC/DSPC/CHOL (squares) and DOPC/DPPC/CHOL (triangles) domains, for  $t1$  tieline compositions (Fig. 1 and Table S1). (Shaded symbols) Results for  $L_d$  domain; (open symbols) results for  $L_o$  domain.

Hence, the  $L_o/L_d$  coexistence regime reduces asymmetrically with temperature, i.e., closes-in faster on the  $L_d$  boundary than on the  $L_o$  boundary, in agreement with Buboltz et al. (63) (and see the Supporting Material).

Finally, it is interesting to compare the relative increase of the  $L_d$  fraction in the studied temperature range. For DOPC/DSPC/CHOL,  $c_{L_d}$  increased with temperature by 16% for the  $t1$  and 25% for the  $t2$  tieline, respectively. Differences are smaller for DOPC/DPPC/CHOL, with  $\Delta c_{L_d} = 9\%$  for  $t1$  and 16% for  $t2$ , but here changes are more pronounced at higher cholesterol content. Hence, increasing cholesterol concentration appears to promote melting of  $L_o$ . This can be understood by reviewing the height differences between  $L_d$  and  $L_o$  domains (Table 1). For DSPC-containing mixtures,  $\Delta d_B = 11.3 \text{ \AA}$  for the  $t1$  tieline and  $\Delta d_B = 10 \text{ \AA}$  or  $t2$ , whereas  $\Delta d_B = 9.7 \text{ \AA}$  and  $\Delta d_B = 7.5 \text{ \AA}$  for the  $t1$  and  $t2$  tuelines in DOPC/DPPC/CHOL. Thus,  $\Delta d_B$  decreases with cholesterol concentration for both systems. The height differences are

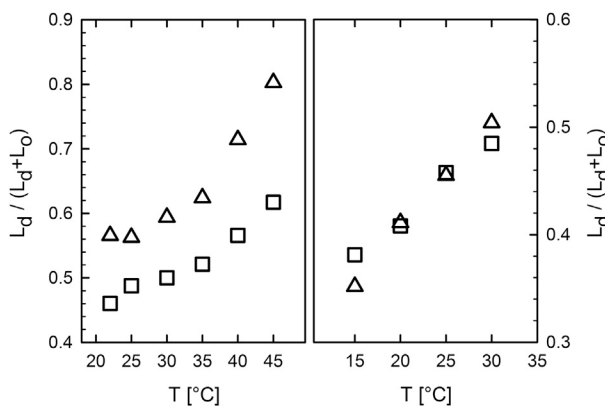

FIGURE 7 Variation of  $L_d$  phase fraction with temperature. (Left) Results for DOPC/DSPC/CHOL. (Right) Results for DOPC/DPPC/CHOL. (Squares) Results for  $t1$  tuelines; (triangles) results for  $t2$  tuelines.

related to the line tension  $\gamma$  between  $L_d$  and  $L_o$  domains. In particular, Akimov et al. (30) showed that  $\gamma \propto \Delta d_B^2$ . Consequently, the cholesterol-induced decrease of  $\Delta d_B$  leads to a lowering of  $\gamma$ , facilitating the melting of  $L_o$  domains.

## CONCLUSIONS

We introduced a global SAXS data analysis technique, which yields structural and elastic properties of coexisting  $L_o/L_d$  domains in multilamellar vesicles. The model captures 1) high structural resolution by incorporating the SDP model (40) and 2) bending fluctuations through a Bragg peak line-shape analysis in terms of the Caillé theory structure factor (39). The method has been verified on DOPC/DSPC/CHOL and DOPC/DPPC/CHOL mixtures by comparing tieline endpoint with midpoint data of corresponding phase coexistence samples, and by essaying whether it captures the effects of chain length increase for  $L_o$  domains, such as thickness increase or a decrease of lipid area.

We further characterized two tuelines for each ternary mixture to study effects of increased cholesterol concentration. Interestingly, additional cholesterol affected mostly structural properties of the  $L_d$  phase (increase of  $d_B$  and  $d_C$ , decrease of  $A$ , and decrease of  $\eta$ ), whereas  $L_o$  appeared to be already saturated. A further effect of higher cholesterol concentration was a decrease of the thickness difference between  $L_o$  and  $L_d$  domains, leading to a lowering of line tension and consequently to a destabilization of  $L_o$  domains that is somehow analogous to the well-known order/disorder effect of cholesterol in binary lipid mixtures (64). The temperature behavior revealed structural and elastic changes during melting of  $L_o$  domains, which suggest that cholesterol diffuses into  $L_d$  domains even below  $T_C$ .

Because of its ability to analyze phase coexistence data without using labels, our technique should be able contribute to resolving several open questions in the field. One of the many controversial issues of raftlike lipid mixtures, for example, is their critical behavior across the transition into a homogeneous phase. According to theory, any defined order parameter should vary  $\propto (T_C - T)^\beta$ , where the critical exponent  $\beta$  is either 0.125 or 0.325, depending on whether the system follows the two- or three-dimensional Ising model, respectively (23,65–68). Fluorescence microscopy experiments on compositional fluctuations in the vicinity of  $T_C$  revealed a two-dimensional Ising model-like behavior (65–67). In contrast, atomic force measurements on the height-difference of  $L_o/L_d$  (68) and first momenta of NMR spectra (23) reported critical exponents favoring the three-dimensional Ising model. We analyzed the height difference between  $L_o$  and  $L_d$  phases across  $T_C$  to determine a critical exponent (Fig. S8). Our results favor the two-dimensional Ising model, but the apparently coarse temperature steps preclude us from any firm statement.

Future studies will be designed to exactly address this issue. Another interesting application for our technique will be to predict protein activity and partitioning in domains (17), which can be achieved by adding information on spontaneous curvatures (69) and bending elasticities (31,33) of  $L_o$  and  $L_d$  domains. This work is underway in our laboratory.

## SUPPORTING MATERIAL

Supporting Materials and Methods, nine figures, and two tables are available at [http://www.biophysj.org/biophysj/supplemental/S0006-3495\(14\)04817-6](http://www.biophysj.org/biophysj/supplemental/S0006-3495(14)04817-6).

## ACKNOWLEDGMENTS

We are grateful to George Khelashvili and Milka Doktorova for sharing MD simulation data on  $L_o$  phases and for providing us with the MD simulation snapshot. We further thank Frederick A. Heberle, Jianjun Pan, and John Katsaras for valuable discussions.

This work was supported by the Austrian Science Fund FWF, Project No. P24459-B20 (to G.P.).

## REFERENCES

1. Simons, K., and E. Ikonen. 1997. Functional rafts in cell membranes. *Nature*. 387:569–572.
2. Simons, K., and D. Toomre. 2000. Lipid rafts and signal transduction. *Nat. Rev. Mol. Cell Biol.* 1:31–39.
3. Edidin, M. 2003. The state of lipid rafts: from model membranes to cells. *Annu. Rev. Biophys. Biomol. Struct.* 32:257–283.
4. McMullen, T. P. W., R. N. A. H. Lewis, and R. N. McElhaney. 2004. Cholesterol-phospholipid interactions, the liquid-ordered phase, and lipid rafts in model and biological membranes. *Curr. Opin. Colloid Interface Sci.* 8:459–468.
5. London, E. 2005. How principles of domain formation in model membranes may explain ambiguities concerning lipid raft formation in cells. *Biochim. Biophys. Acta.* 1746:203–220.
6. Brown, D. A., and E. London. 2000. Structure and function of sphingolipid- and cholesterol-rich membrane rafts. *J. Biol. Chem.* 275:17221–17224.
7. Brown, D. A., and E. London. 1998. Structure and origin of ordered lipid domains in biological membranes. *J. Membr. Biol.* 164:103–114.
8. Goñi, F. M., A. Alonso, ..., J. L. Thewalt. 2008. Phase diagrams of lipid mixtures relevant to the study of membrane rafts. *Biochim. Biophys. Acta.* 1781:665–684.
9. Marsh, D. 2010. Liquid-ordered phases induced by cholesterol: a compendium of binary phase diagrams. *Biochim. Biophys. Acta.* 1798:688–699.
10. Marsh, D. 2009. Cholesterol-induced fluid membrane domains: a compendium of lipid-raft ternary phase diagrams. *Biochim. Biophys. Acta.* 1788:2114–2123.
11. Heberle, F. A. 2014. Liposome-based models for membrane rafts: methodology and applications. In *Liposomes, Lipid Bilayers and Model Membranes: From Basic Research to Application*. CRC Press, Boca Raton, FL.
12. van Meer, G., D. R. Voelker, and G. W. Feigenson. 2008. Membrane lipids: where they are and how they behave. *Nat. Rev. Mol. Cell Biol.* 9:112–124.
13. Frisz, J. F., H. A. Klitzing, ..., M. L. Kraft. 2013. Sphingolipid domains in the plasma membranes of fibroblasts are not enriched with cholesterol. *J. Biol. Chem.* 288:16855–16861.
14. Frisz, J. F., K. Lou, ..., M. L. Kraft. 2013. Direct chemical evidence for sphingolipid domains in the plasma membranes of fibroblasts. *Proc. Natl. Acad. Sci. USA.* 110:E613–E622.
15. Veatch, S. L., and S. L. Keller. 2005. Seeing spots: complex phase behavior in simple membranes. *Biochim. Biophys. Acta.* 1746:172–185.
16. Killian, J. A. 1998. Hydrophobic mismatch between proteins and lipids in membranes. *Biochim. Biophys. Acta.* 1376:401–415.
17. Pabst, G. 2013. Coupling of membrane elasticity and structure to protein function. In *Advances in Planar Lipid Bilayers and Liposomes, Vol. 18*. A. Iglic, and C. Kulkarni, editors. Academic Press, London, United Kingdom, p. 282.
18. Binder, W. H., V. Barragan, and F. M. Menger. 2003. Domains and rafts in lipid membranes. *Angew. Chem. Int. Ed. Engl.* 42:5802–5827.
19. Veatch, S. L., and S. L. Keller. 2002. Organization in lipid membranes containing cholesterol. *Phys. Rev. Lett.* 89:268101.
20. Pitcher, 3rd, W. H., S. L. Keller, and W. H. Huestis. 2002. Interaction of nominally soluble proteins with phospholipid monolayers at the air-water interface. *Biochim. Biophys. Acta.* 1564:107–113.
21. McIntosh, T. J., A. Vidal, and S. A. Simon. 2003. Sorting of lipids and transmembrane peptides between detergent-soluble bilayers and detergent-resistant rafts. *Biophys. J.* 85:1656–1666.
22. Gandhavadi, M., D. Allende, ..., T. J. McIntosh. 2002. Structure, composition, and peptide binding properties of detergent soluble bilayers and detergent resistant rafts. *Biophys. J.* 82:1469–1482.
23. Davis, J. H., and M. L. Schmidt. 2014. Critical behavior in DOPC/DPPC/cholesterol mixtures: static  $^2\text{H}$  NMR line shapes near the critical point. *Biophys. J.* 106:1970–1978.
24. Chiang, Y.-W., Y. Shimoyama, ..., J. H. Freed. 2004. Dynamic molecular structure of DPPC-DLPC-cholesterol ternary lipid system by spin-label electron spin resonance. *Biophys. J.* 87:2483–2496.
25. Ionova, I. V., V. A. Livshits, and D. Marsh. 2012. Phase diagram of ternary cholesterol/palmitoylsphingomyelin/palmitoyl-oleoyl-phosphatidylcholine mixtures: spin-label EPR study of lipid-raft formation. *Biophys. J.* 102:1856–1865.
26. Tokumasu, F., A. J. Jin, ..., J. A. Dvorak. 2003. Nanoscopic lipid domain dynamics revealed by atomic force microscopy. *Biophys. J.* 84:2609–2618.
27. Mills, T. T., S. Tristram-Nagle, ..., G. W. Feigenson. 2008. Liquid-liquid domains in bilayers detected by wide angle x-ray scattering. *Biophys. J.* 95:682–690.
28. Chen, L., Z. Yu, and P. J. Quinn. 2007. The partition of cholesterol between ordered and fluid bilayers of phosphatidylcholine: a synchrotron x-ray diffraction study. *Biochim. Biophys. Acta.* 1768:2873–2881.
29. Bennett, W. F. D., and D. P. Tieleman. 2013. Computer simulations of lipid membrane domains. *Biochim. Biophys. Acta.* 1828:1765–1776.
30. Akimov, S. A., P. I. Kuzmin, ..., Y. A. Chizmadzhev. 2004. An elastic theory for line tension at a boundary separating two lipid monolayer regions of different thickness. *J. Electroanal. Chem.* 564:13–18.
31. Khelashvili, G., B. Kollmitzer, ..., D. Harries. 2013. Calculating the bending modulus for multicomponent lipid membranes in different thermodynamic phases. *J. Chem. Theory Comput.* 9:3866–3871.
32. Rawicz, W., B. A. Smith, ..., E. Evans. 2008. Elasticity, strength, and water permeability of bilayers that contain raft microdomain-forming lipids. *Biophys. J.* 94:4725–4736.
33. Pabst, G., N. Kučerka, ..., J. Katsaras. 2010. Applications of neutron and x-ray scattering to the study of biologically relevant model membranes. *Chem. Phys. Lipids.* 163:460–479.
34. Pan, J., F. A. Heberle, ..., J. Katsaras. 2013. Using small-angle neutron scattering to detect nanoscopic lipid domains. *Chem. Phys. Lipids.* 170:171:19–32.
35. Heberle, F. A., R. S. Petruzielo, ..., J. Katsaras. 2013. Bilayer thickness mismatch controls domain size in model membranes. *J. Am. Chem. Soc.* 135:6853–6859.



36. Tsamaloukas, A., H. Szadkowska, and H. Heerklotz. 2006. Nonideal mixing in multicomponent lipid/detergent systems. *J. Phys. Condens. Matter.* 18:S1125–S1138.
37. Tayebi, L., Y. Ma, ..., A. N. Parikh. 2012. Long-range interlayer alignment of intralayer domains in stacked lipid bilayers. *Nat. Mater.* 11:1074–1080.
38. Karmakar, S., B. R. Sarangi, and V. A. Raghunathan. 2006. Phase behavior of lipid-cholesterol membranes. *Solid State Commun.* 139: 630–634.
39. Pabst, G., M. Rappolt, ..., P. Laggner. 2000. Structural information from multilamellar liposomes at full hydration: full  $q$ -range fitting with high quality x-ray data. *Phys. Rev. E Stat. Phys. Plasmas Fluids Relat. Interdiscip. Topics.* 62 (3 Pt B):4000–4009.
40. Kučerka, N., J. F. Nagle, ..., J. Katsaras. 2008. Lipid bilayer structure determined by the simultaneous analysis of neutron and x-ray scattering data. *Biophys. J.* 95:2356–2367.
41. Heftberger, P., B. Kollmitzer, ..., G. Pabst. 2014. Global small-angle x-ray scattering data analysis for multilamellar vesicles: the evolution of the scattering density profile model. *J. Appl. Cryst.* 47:173–180.
42. Hammersley, A. 1997. ESRF Internal Report, ESRF97HA02T, FIT2D: An Introduction and Overview. European Synchrotron Radiation Facility, Grenoble, France.
43. Glatter, O., and O. Kratky. 1982. Small Angle X-Ray Scattering, Vol. 102. Academic Press, London, United Kingdom.
44. Caillé, A. 1972. Notes on the distribution of x-rays in smectics [Remarques sur la diffusion des rayons x dans les smectiques A]. *Acad. Sci. Paris B.* 274:891–893.
45. Zhang, R., R. M. Suter, and J. F. Nagle. 1994. Theory of the structure factor of lipid bilayers. *Phys. Rev. E Stat. Phys. Plasmas Fluids Relat. Interdiscip. Topics.* 50:5047–5060.
46. Pabst, G., R. Koschuch, ..., P. Laggner. 2003. Structural analysis of weakly ordered membrane stacks. *J. Appl. Cryst.* 36:1378–1388.
47. Kučerka, N., M.-P. Nieh, and J. Katsaras. 2011. Fluid phase lipid areas and bilayer thicknesses of commonly used phosphatidylcholines as a function of temperature. *Biochim. Biophys. Acta.* 1808:2761–2771.
48. Pan, J., X. Cheng, ..., J. Katsaras. 2012. Interactions between ether phospholipids and cholesterol as determined by scattering and molecular dynamics simulations. *J. Phys. Chem. B.* 116:14829–14838.
49. Uppamoochikkal, P., S. Tristram-Nagle, and J. F. Nagle. 2010. Orientation of tie-lines in the phase diagram of DOPC/DPPC/cholesterol model biomembranes. *Langmuir.* 26:17363–17368.
50. Heberle, F. A., J. Wu, ..., G. W. Feigenson. 2010. Comparison of three ternary lipid bilayer mixtures: FRET and ESR reveal nanodomains. *Biophys. J.* 99:3309–3318.
51. Koenig, B. W., and K. Gawrisch. 2005. Specific volumes of unsaturated phosphatidylcholines in the liquid crystalline lamellar phase. *Biochim. Biophys. Acta.* 1715:65–70.
52. Greenwood, A. I., S. Tristram-Nagle, and J. F. Nagle. 2006. Partial molecular volumes of lipids and cholesterol. *Chem. Phys. Lipids.* 143:1–10.
53. Davis, J. H., J. J. Clair, and J. Juhasz. 2009. Phase equilibria in DOPC/DPPC-d62/cholesterol mixtures. *Biophys. J.* 96:521–539.
54. Veatch, S. L., O. Soubias, ..., K. Gawrisch. 2007. Critical fluctuations in domain-forming lipid mixtures. *Proc. Natl. Acad. Sci. USA.* 104: 17650–17655.
55. Veatch, S. L., I. V. Polozov, ..., S. L. Keller. 2004. Liquid domains in vesicles investigated by NMR and fluorescence microscopy. *Biophys. J.* 86:2910–2922.
56. Pan, J., S. Tristram-Nagle, and J. F. Nagle. 2009. Effect of cholesterol on structural and mechanical properties of membranes depends on lipid chain saturation. *Phys. Rev. E Stat. Nonlin. Soft Matter Phys.* 80:021931.
57. McConnell, H. M., and A. Radhakrishnan. 2003. Condensed complexes of cholesterol and phospholipids. *Biochim. Biophys. Acta.* 1610:159–173.
58. Hodzic, A., M. Rappolt, ..., G. Pabst. 2008. Differential modulation of membrane structure and fluctuations by plant sterols and cholesterol. *Biophys. J.* 94:3935–3944.
59. Pan, J., T. T. Mills, ..., J. F. Nagle. 2008. Cholesterol perturbs lipid bilayers nonuniversally. *Phys. Rev. Lett.* 100:198103.
60. Pabst, G., H. Amenitsch, ..., M. Rappolt. 2004. Structure and fluctuations of phosphatidylcholines in the vicinity of the main phase transition. *Phys. Rev. E Stat. Nonlin. Soft Matter Phys.* 70:021908.
61. Pabst, G., J. Katsaras, ..., M. Rappolt. 2003. Structure and interactions in the anomalous swelling regime of phospholipid bilayers. *Langmuir.* 19:1716–1722.
62. Parsegian, V. A., R. P. Rand, and D. C. Rau. 1995. Macromolecules and water: probing with osmotic stress. In *Energetics of Biological Macromolecules*, Vol. 259, Methods in Enzymology. M. L. Johnson and G. K. Ackers, editors. Academic Press, London, United Kingdom, pp. 43–94.
63. Buboltz, J. T., C. Bwalya, ..., M. Schutzer. 2007. High resolution mapping of phase behavior in a ternary lipid mixture: do lipid-raft phase boundaries depend on sample-prep procedure? *Langmuir.* 23:11968–11971.
64. Mouritsen, O. G., and K. Jørgensen. 1994. Dynamical order and disorder in lipid bilayers. *Chem. Phys. Lipids.* 73:3–25.
65. Honerkamp-Smith, A. R., P. Cicuta, ..., S. L. Keller. 2008. Line tensions, correlation lengths, and critical exponents in lipid membranes near critical points. *Biophys. J.* 95:236–246.
66. Honerkamp-Smith, A. R., B. B. Machta, and S. L. Keller. 2012. Experimental observations of dynamic critical phenomena in a lipid membrane. *Phys. Rev. Lett.* 108:265702.
67. Veatch, S. L., P. Cicuta, ..., B. Baird. 2008. Critical fluctuations in plasma membrane vesicles. *ACS Chem. Biol.* 3:287–293.
68. Connell, S. D., G. Heath, ..., A. Kisil. 2013. Critical point fluctuations in supported lipid membranes. *Faraday Discuss.* 161:91–150.
69. Kollmitzer, B., P. Heftberger, ..., G. Pabst. 2013. Monolayer spontaneous curvature of raft-forming membrane lipids. *Soft Matter.* 9:10877–10884.
70. Kučerka, N., J. Katsaras, and J. F. Nagle. 2010. Comparing membrane simulations to scattering experiments: introducing the SIMTOEXP software. *J. Membr. Biol.* 235:43–50.

# Supporting Material

## In situ determination of structure and fluctuations of coexisting fluid membrane domains

Peter Heftberger,<sup>†,‡</sup> Benjamin Kollmitzer,<sup>†,‡</sup> Alexander A. Rieder,<sup>†,‡</sup> Heinz Amenitsch<sup>§</sup>, and Georg Pabst<sup>†,‡</sup> \*

<sup>†</sup> University of Graz, Institute of Molecular Biosciences, Biophysics Division, NAWI Graz, Humboldtstr. 50/III, A-8010 Graz, Austria.

<sup>‡</sup> BioTechMed-Graz, Austria.

<sup>§</sup> Graz University of Technology, Institute of Inorganic Chemistry, Stremayrgasse 9/IV, A-8010 Graz, Austria.

\* Correspondence: georg.pabst@uni-graz.at

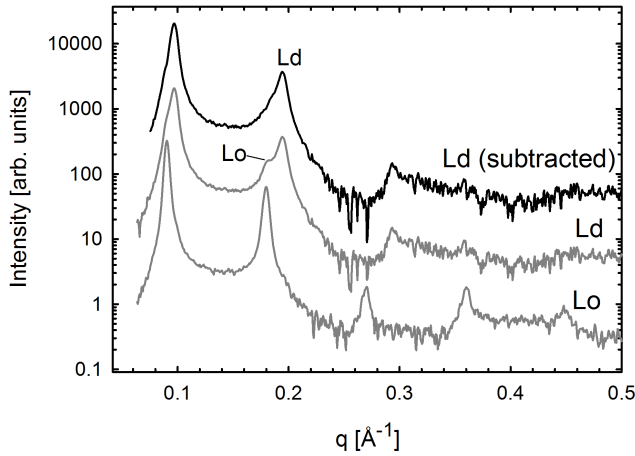

Figure S1: Subtraction of  $L_o$  contribution from  $L_d$  endpoint of  $B_{t2}$ . Scattering intensities are scaled by a constant for clarity. Second order Bragg reflections of  $L_o$  and  $L_d$  phases are indicated. Because of the overlap of  $L_o$  peaks for  $L_o$  and  $L_d$  endpoints (gray lines), we were able to subtract a fraction of  $L_o$  from the  $L_d$  endpoint sample. The result is shown in the top scattering pattern (black line).

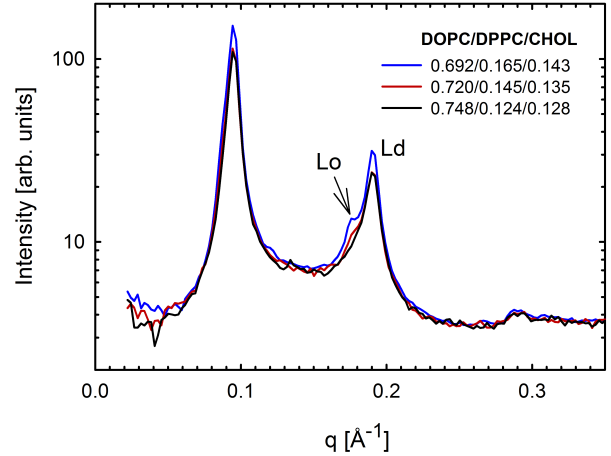

Figure S2: Determination of new  $L_d$  tieline endpoint for  $B_{t2}$ . Scattering patterns for three different lipid compositions, extending the  $B_{t2}$  tieline (1) toward the pure  $L_d$  regime (same angle), are shown. Data were recorded on a S3-Micro compact Kratky camera (Hecus X-ray Systems, Graz, Austria) at 15°C. The second order Bragg peak clearly indicates  $L_o$  contamination. No residual  $L_o$  was observed for the DOPC/DPPC/CHOL composition 0.748/0.124/0.128 (molar fractions).

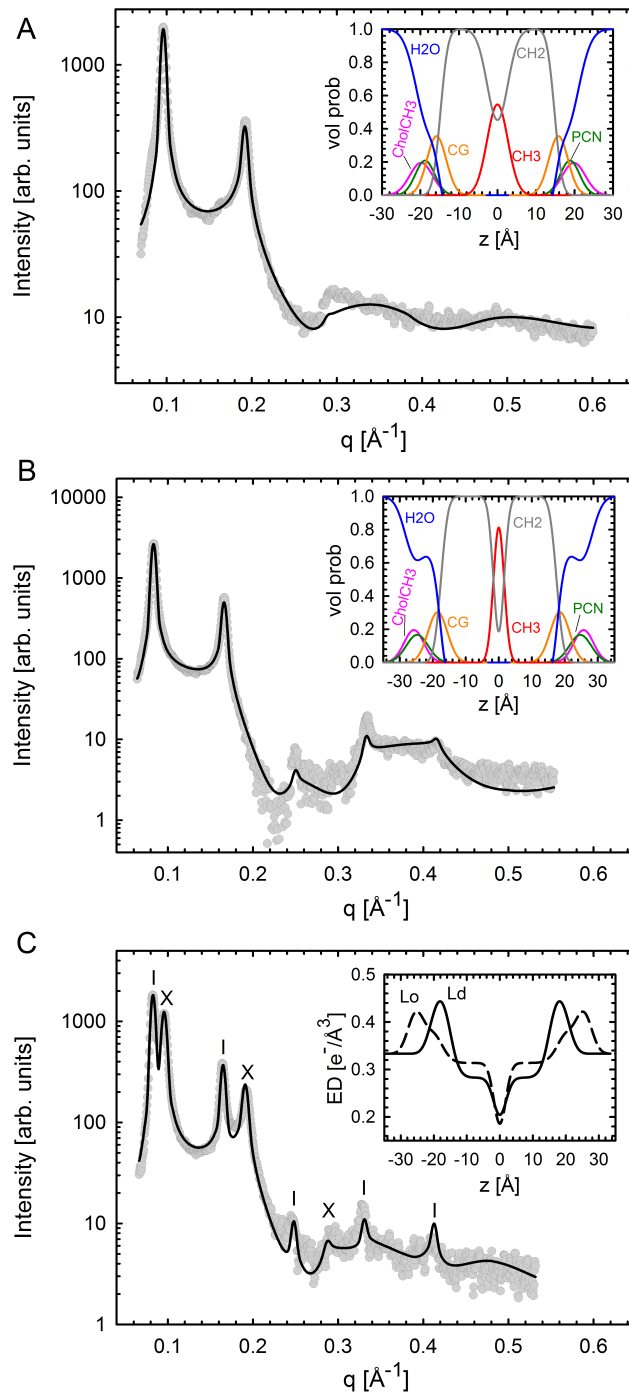

Figure S3: Validation of the global analysis for two coexisting phases for the  $A_{t2}$  tieline ( $T = 22^\circ\text{C}$ ). Panels A and B show fits to  $L_d$  and  $L_o$  endpoint data, respectively. The insets to both panels give the derived volume probability distributions. Panel C shows the best fit to SAXS data at the  $A_{t2}$  tieline midpoint. Bragg reflections of  $L_o$  and  $L_d$  domains are indicated with dashes and crosses, respectively. The corresponding inset gives the ED profiles for  $L_o$  and  $L_d$  phases.

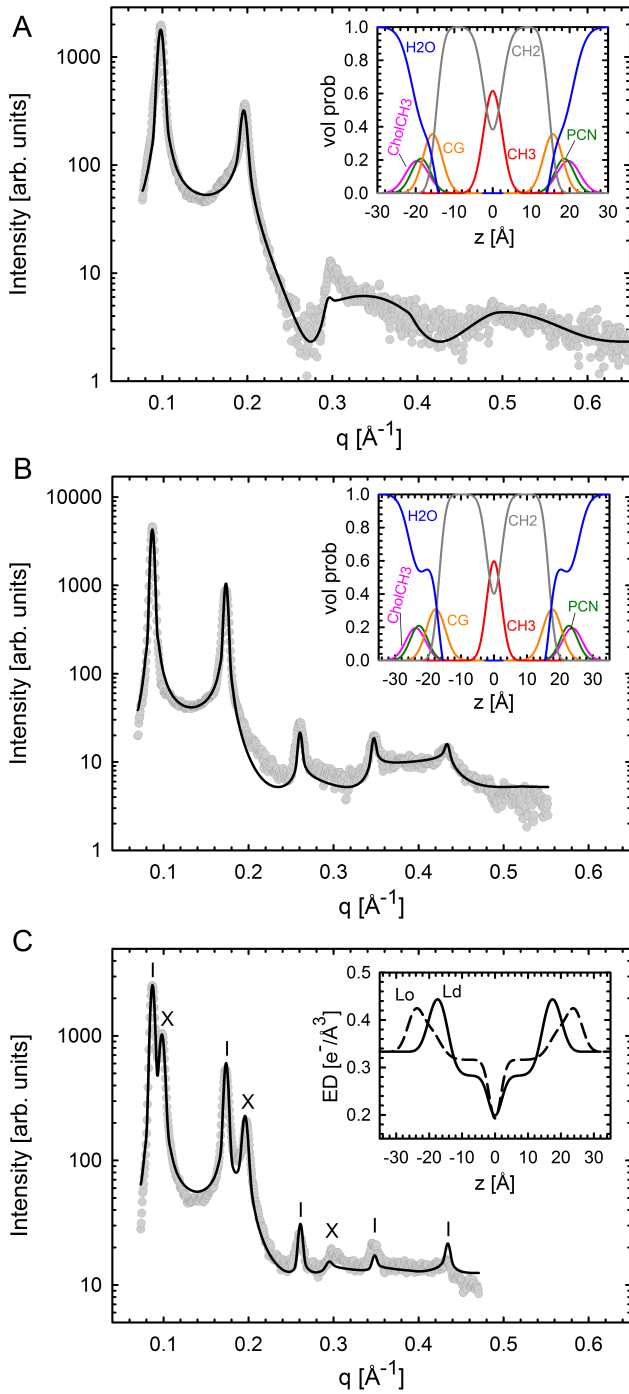

Figure S4: Validation of the global analysis for two coexisting phases for the  $B_{t1}$  tieline ( $T = 15^\circ\text{C}$ ). Panels A and B show fits to  $L_d$  and  $L_o$  endpoint data, respectively. The insets to both panels give the derived volume probability distributions. Panel C shows the best fit to SAXS data at the  $B_{t1}$  tieline midpoint. Bragg reflections of  $L_o$  and  $L_d$  domains are indicated with dashes and crosses, respectively. The corresponding inset gives the ED profiles for  $L_o$  and  $L_d$  phases.

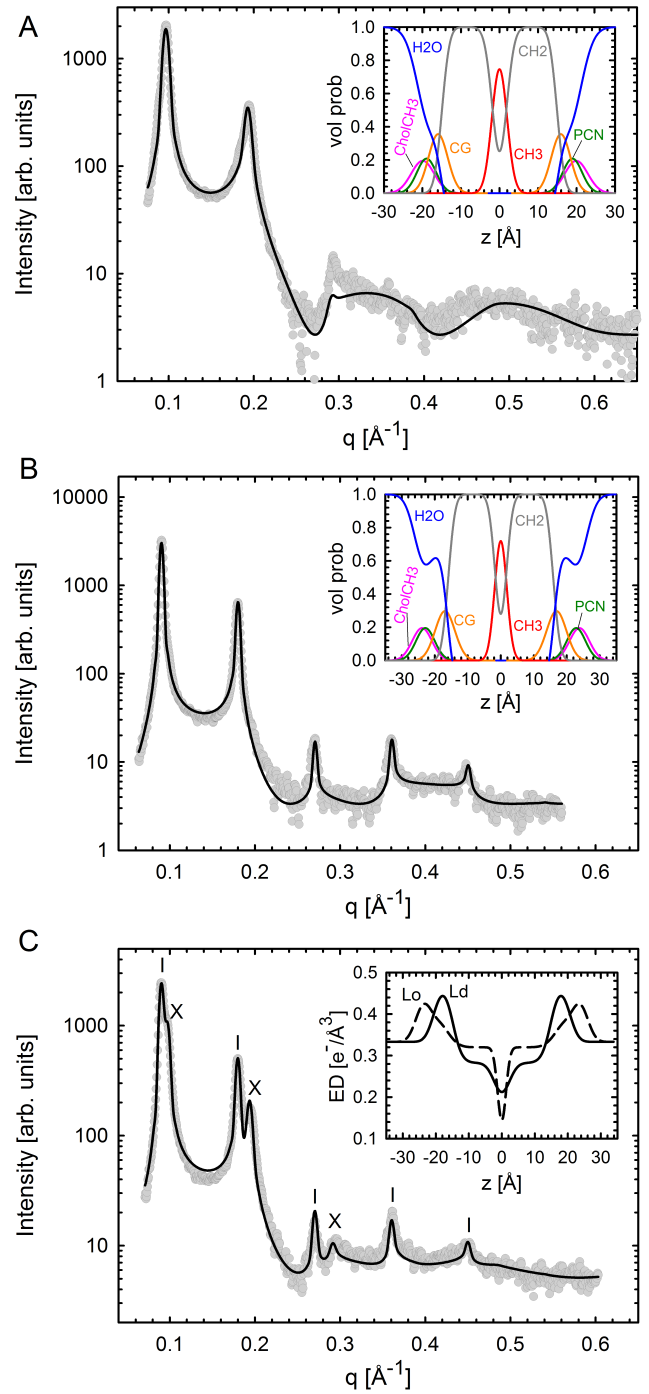

Figure S5: Validation of the global analysis for two coexisting phases for the  $B_{t2}$  tieline ( $T = 15^\circ\text{C}$ ). Panels A and B show fits to  $L_d$  and  $L_o$  endpoint data, respectively. The insets to both panels give the derived volume probability distributions. Panel C shows the best fit to SAXS data at the  $B_{t2}$  tieline midpoint. Bragg reflections of  $L_o$  and  $L_d$  domains are indicated with dashes and crosses, respectively. The corresponding inset gives the ED profiles for  $L_o$  and  $L_d$  phases.

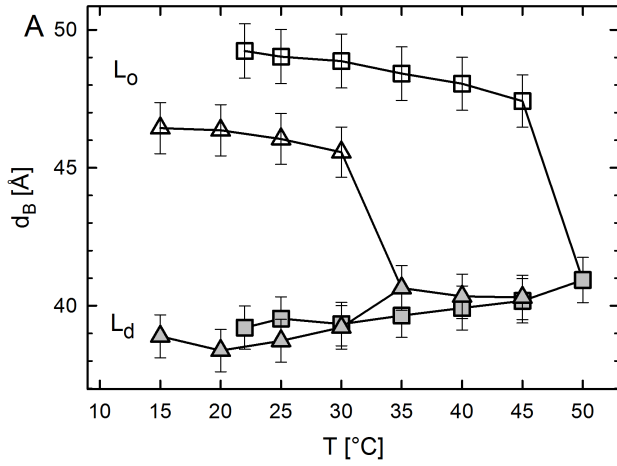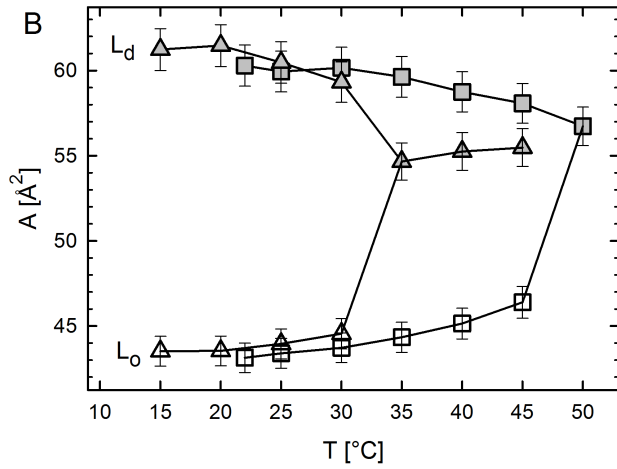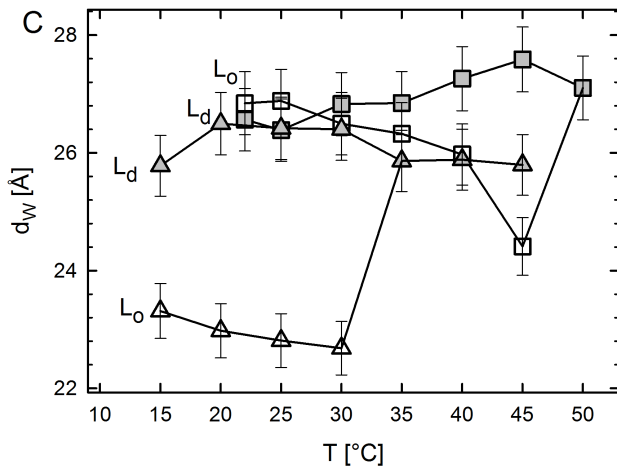

Figure S6: Temperature dependence of structural parameters of coexisting DOPC/DSPC/CHOL (squares) and DOPC/DPPC/CHOL (triangles) domains for  $t_2$  tieline compositions (Fig. 1, Table S1). Panels A–C show the bilayer thickness, area per lipid, and water layer thickness, respectively for  $L_d$  (solid symbols) and  $L_o$  (open symbols) domains.

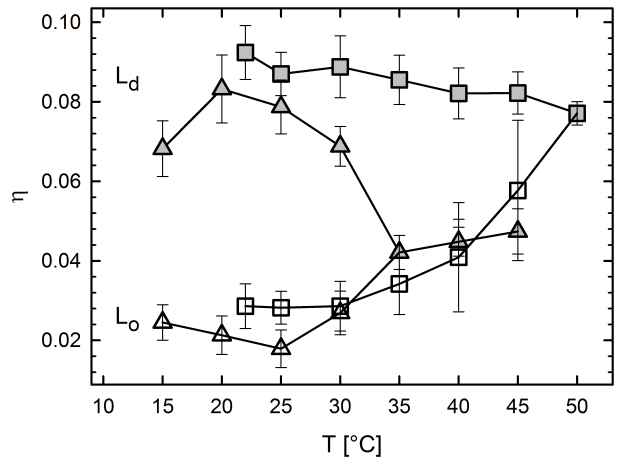

Figure S7: Temperature dependence of bending fluctuations of coexisting DOPC/DSPC/CHOL (squares) and DOPC/DPPC/CHOL (triangles) domains for  $t_2$  tieline compositions (Fig. 1, Table S1). Solid symbols show results for  $L_d$  and open symbols for  $L_o$  domains, respectively.

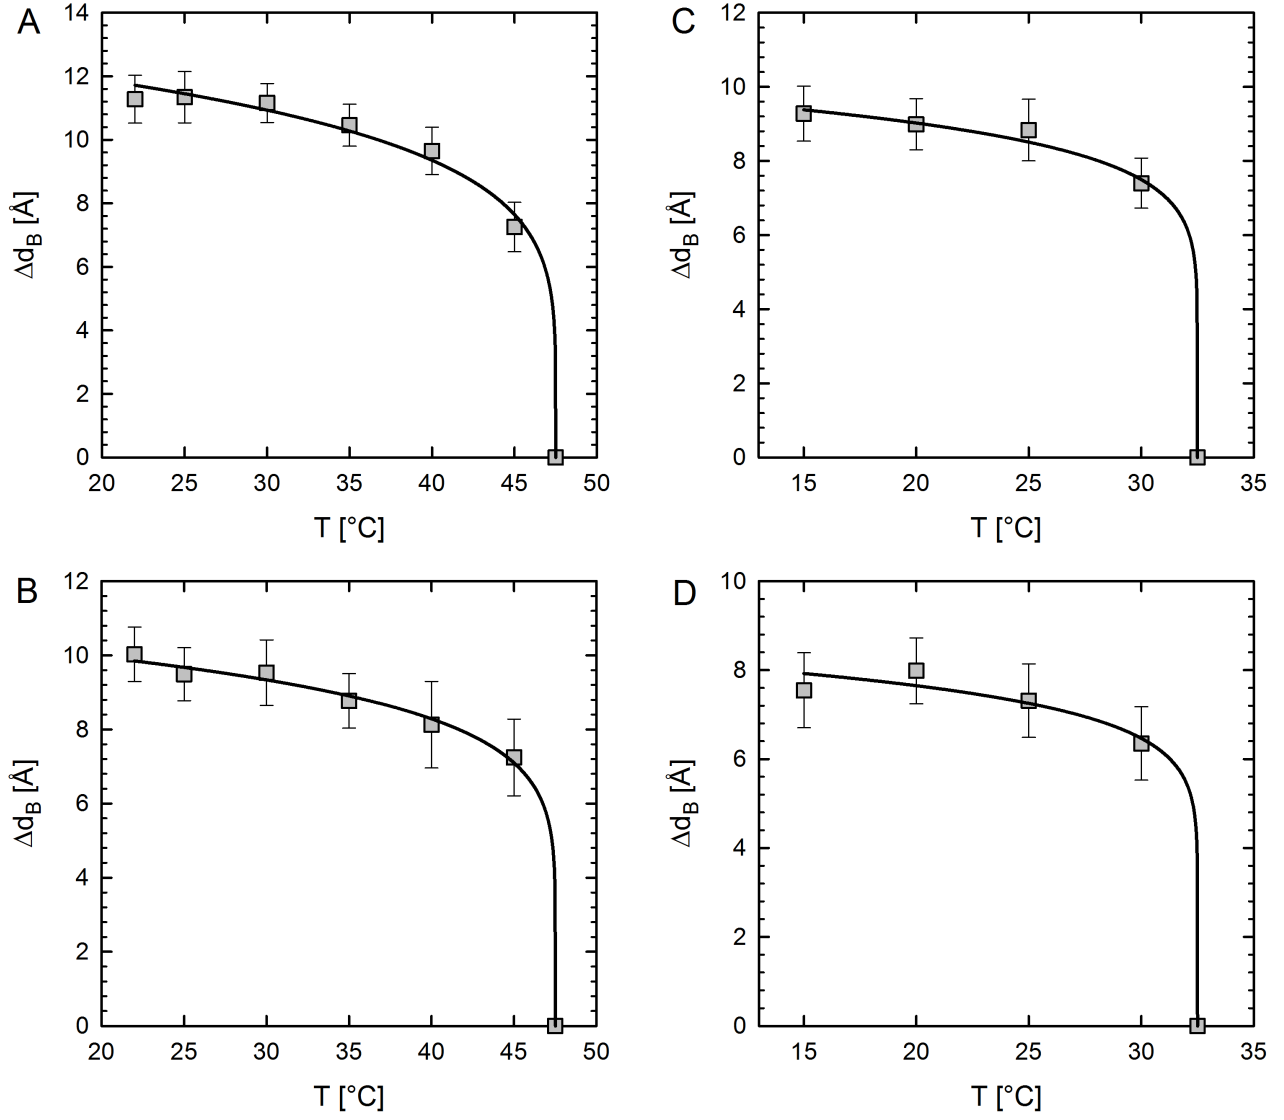

Figure S8: Critical behavior of height difference  $\Delta d_B$  between  $L_o$  and  $L_d$  domains of tieline midpoint samples  $A_{t1}$  (A),  $A_{t2}$  (B),  $B_{t1}$  (C) and  $B_{t2}$  (D). Solid lines correspond to the best fits using  $\Delta d_B \propto (T_C - T)^\beta$ .  $T_C$  was estimated to be 47.5 °C for (A,B) and 32.5 °C for (C,D) yielding the critical exponents  $\beta_A = 0.18$ ,  $\beta_B = 0.14$ ,  $\beta_C = 0.115$  and  $\beta_D = 0.105$ . To evaluate the influence of our choice of  $T_C$ ,  $T_C$  was varied between the extremes of the experimental temperature interval. For  $T_C^{min} = 46/31$  °C (for A,B/C,D), we obtained  $\beta_A = 0.14$ ,  $\beta_B = 0.11$ ,  $\beta_C = 0.08$  and  $\beta_D = 0.08$ . For  $T_C^{max} = 50/35$  °C (for A,B/C,D), we found  $\beta_A = 0.24$ ,  $\beta_B = 0.19$ ,  $\beta_C = 0.16$  and  $\beta_D = 0.24$ .

Table S1: Lipid compositions (molar fractions) of measured samples according to published compositional phase diagrams (1, 2). Two tielines with a lower ( $A_{t1}, B_{t1}$ ) and higher ( $A_{t2}, B_{t2}$ ) cholesterol concentration were studied (see Fig. 1).

|          |           | DOPC | DSPC | CHOL |
|----------|-----------|------|------|------|
| $A_{t1}$ | $L_d$     | 0.79 | 0.09 | 0.12 |
|          | $L_o$     | 0.05 | 0.65 | 0.30 |
|          | $L_d/L_o$ | 0.42 | 0.37 | 0.21 |
| $A_{t2}$ | $L_d$     | 0.74 | 0.09 | 0.17 |
|          | $L_o$     | 0.12 | 0.56 | 0.32 |
|          | $L_d/L_o$ | 0.46 | 0.30 | 0.24 |
|          |           | DOPC | DPPC | CHOL |
| $B_{t1}$ | $L_d$     | 0.70 | 0.23 | 0.07 |
|          | $L_o$     | 0.11 | 0.68 | 0.21 |
|          | $L_d/L_o$ | 0.37 | 0.47 | 0.16 |
| $B_{t2}$ | $L_d$     | 0.66 | 0.19 | 0.15 |
|          | $L_o$     | 0.12 | 0.58 | 0.30 |
|          | $L_d/L_o$ | 0.36 | 0.41 | 0.23 |

Table S2: Structural results and bending fluctuations for the studied tieline endpoints.  $V_L$  are the calculated and  $V'_L$  the experimentally determined molecular volumes of an effective lipid molecule, including contributions from all three components (for details, see subsequent section). Parameter uncertainties are  $< 2\%$ .

|              | $d_B[\text{\AA}]$ | $A[\text{\AA}^2]$ | $d_W[\text{\AA}]$ | $d_C[\text{\AA}]$ | $\eta$ | $V_L[\text{\AA}^3]$ | $V'_L[\text{\AA}^3]$ |
|--------------|-------------------|-------------------|-------------------|-------------------|--------|---------------------|----------------------|
| $A_{t1}-L_d$ | 38.6              | 62.9              | 25.8              | 14.6              | 0.079  | 1215                | 1233                 |
| $A_{t1}-L_o$ | 48.6              | 44.2              | 26.9              | 18.2              | 0.047  | 1075                | 1063                 |
| $A_{t2}-L_d$ | 39.1              | 60.5              | 26.3              | 14.8              | 0.097  | 1183                | 1200                 |
| $A_{t2}-L_o$ | 48.0              | 44.3              | 27.4              | 17.9              | 0.060  | 1065                | 1058                 |
| $B_{t1}-L_d$ | 38.8              | 63.5              | 25.2              | 14.7              | 0.082  | 1231                | 1227                 |
| $B_{t1}-L_o$ | 46.6              | 44.9              | 25.8              | 17.4              | 0.027  | 1047                | 1049                 |
| $B_{t2}-L_d$ | 39.3              | 60.6              | 25.6              | 14.9              | 0.078  | 1191                | 1183                 |
| $B_{t2}-L_o$ | 45.9              | 44.0              | 23.7              | 17.0              | 0.028  | 1010                | 1015                 |

## Lipid volume calculation

The calculated lipid volumes of the ternary mixtures described in Material and Methods, were compared to experimentally determined volumes using the density sound analyzer DSA5000 (Anton Paar, Graz, Austria). Specifically, experiments yielded the partial specific volume (see e.g. (3))

$$v_s = \frac{1}{\rho_0} \left( 1 - \frac{\rho_s - \rho_0}{c} \right), \quad (1)$$

where  $\rho_0$  is the density of the solvent,  $\rho_s$  density of the solution and  $c$  the solute concentration. The experimental volume per molecule is then calculated according to Greenwood et al. as (4):

$$V'_L = \frac{v_s}{N_A} (x_1 M_1 + x_2 M_2 + x_3 M_3), \quad (2)$$

where  $N_A$  is Avogadro's number,  $x_i$  molar fraction and  $M_i$  the molecular weights.

Alternatively, volumes can be calculated by (5)

$$V_L(T) = V_H + n_{CH} V_{CH}(T) + n_{CH_2} V_{CH_2}(T) + n_{CH_3} V_{CH_3}(T), \quad (3)$$

where the head group volume  $V_H$  is kept fixed at  $319 \text{ \AA}^3$ .  $V_{CH}$ ,  $V_{CH_2}$ ,  $V_{CH_3}$  are the segmental volumes of methine-, methylene-, and methyl groups and  $n_{CH}$ ,  $n_{CH_2}$ ,  $n_{CH_3}$  are the number of CH, CH<sub>2</sub>, CH<sub>3</sub> groups per lipid molecule, respectively. A detailed description of the temperature dependence can be found in (5). Experimental and calculated molecular volumes were found to agree within experimental uncertainties (Table S2).

## Estimation of temperature dependent compositional changes

Assuming that the inclination of tielines remains constant with temperature, tieline endpoints can be estimated using the lever rule. Specifically, we determined the distances between tieline midpoints and tieline endpoints  $\overline{Ld}$ ,  $\overline{Lo}$  using

$$c_{Ld}(T) = \frac{\overline{Lo}(T)}{\overline{tl}(T)} \quad (4)$$

$$c_{Lo}(T) = 1 - c_{Ld}(T) = \frac{\overline{Ld}(T)}{\overline{tl}(T)}, \quad (5)$$

where  $\overline{tl}(T)$  is the overall tieline length.  $\overline{tl}$  was estimated to change with temperature in proportion to the  $L_o$  fraction. Arbitrary functions were used to fit  $c_{Lo}(T)$  data. Results are shown in Fig. S9. Estimates reproduce the asymmetric closing-in of the phase boundaries reported previously (6), which originate here from the measured increase of the  $L_d$  phase fraction.

Uppamoochikkal et al. (1) reported a small but significant increase of the tieline inclination angle with temperature. Therefore we checked, how this would influence our structural results. Note that this concerns only the area per lipid  $A$ , as results for all other parameter do not depend on knowing the specific lipid compositions of  $L_o/L_d$  domains. Hence, we tested several functions for the temperature behavior of the tielines, without finding any effects on the relative changes of  $A$ . Changes were observed for absolute values of  $A$  at the higher temperatures. However, they remained small, i.e. within  $\pm 3\%$ .



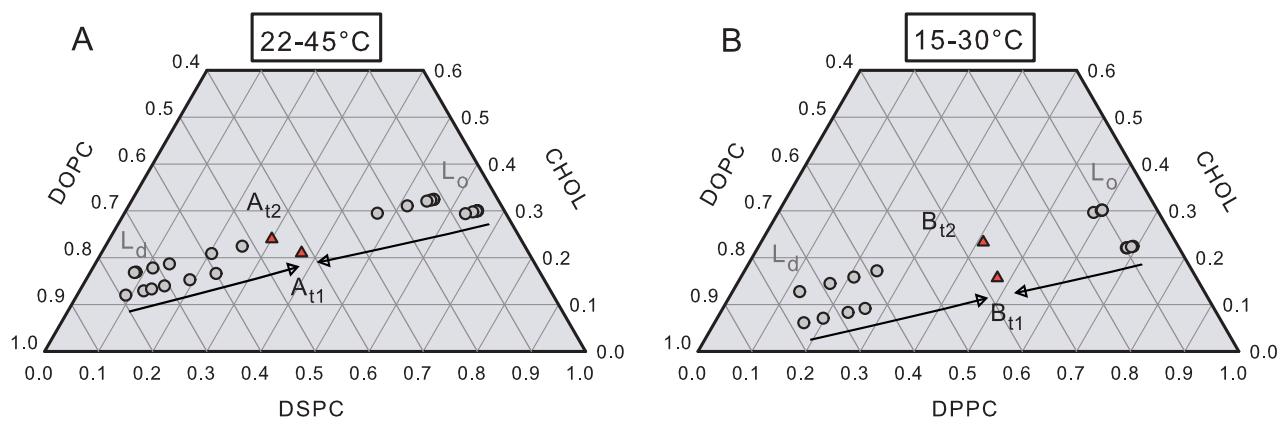

Figure S9: Estimated temperature dependence of tie-line endpoints for DOPC/DSPC/CHOL (panel A) and DOPC/DPPC/CHOL (panel B). Triangles represent starting points at the tie-line midpoints. Circles indicate the corresponding estimated tie-line endpoints, which shift toward the midpoints as temperature is increased. The temperature increment was 5°C only the first temperature step for DOPC/DSPC/CHOL was smaller (3°C). Note that  $L_d$  endpoints approach tie-line midpoints more rapidly than  $L_o$  endpoints.

## Supporting References

1. Uppamoochikkal, P., S. Tristram-Nagle, and J. F. Nagle, 2010. Orientation of tie-lines in the phase diagram of DOPC:DPPC:cholesterol model biomembranes. *Langmuir* 26:17363–17368.
2. Heberle, F. A., J. Wu, S. L. Goh, R. S. Petruzielo, and G. W. Feigenson, 2010. Comparison of three ternary lipid bilayer mixtures: FRET and ESR reveal nanodomains. *Biophys. J.* 99:3309–3318.
3. Hodzic, A., M. Rappolt, H. Amenitsch, P. Laggnier, and G. Pabst, 2008. Differential modulation of membrane structure and fluctuations by plant sterols and cholesterol. *Biophys. J.* 94:3935–3944.
4. Greenwood, A. I., S. Tristram-Nagle, and J. F. Nagle, 2006. Partial molecular volumes of lipids and cholesterol. *Chem. Phys. Lipids* 143:1–10.
5. Koenig, B. W., and K. Gawrisch, 2005. Specific volumes of unsaturated phosphatidylcholines in the liquid crystalline lamellar phase. *Biochim. Biophys. Acta.* 1715:65–70.
6. Buboltz, J. T., C. Bwalya, K. Williams, and M. Schutzer, 2007. High resolution mapping of phase behavior in a ternary lipid mixture: Do lipid-raft phase boundaries depend on sample-prep procedure? *arXiv:0706.1374 [physics]* arXiv: 0706.1374.
